# Supplementary material for: A safe and efficient synthetic method for alkali metal octahydrotriborates, unravelling a general mechanism for constructing the delta B3 unit of polyhedral boranes
Source: Royal Society of Chemistry journal article supplement (doi:10.1039/d1dt01892b), 2021-01-01
Supplement: d1dt01892b1.pdf [file d1dt01892b1.pdf]

## Supporting Information for

# **A Safe and Efficient Synthetic Method of the Alkali Metal Octahydrotriborate, Unravelling a General Mechanism of Constructing the Delta B<sub>3</sub> Unit of Polyhedral Boranes**

Xuenian Chen,<sup>\*a,b</sup> Xin-Ran Liu,<sup>b</sup> Xinghua Wang,<sup>a</sup> Xi-Meng Chen,<sup>b</sup> Yi Jing,<sup>b</sup> Donghui Wei<sup>\*a</sup>

- a. College of Chemistry and Institute of Green Catalysis, Zhengzhou University, Zhengzhou, Henan 450001, China.
- b. Henan Key Laboratory of Boron Chemistry and Advanced Energy Materials, School of Chemistry and Chemical Engineering, Henan Normal University, Xinxiang, Henan 453007, China.

\*E-mail: Xuenian\_Chen@zzu.edu.cn (X.C.), donghuiwei@zzu.edu.cn (D. W.)

## Table of Contents:

|                                                                                                                                              |    |
|----------------------------------------------------------------------------------------------------------------------------------------------|----|
| 1. Experimental Section .....                                                                                                                | 3  |
| 1.1. General Remarks.....                                                                                                                    | 3  |
| 1.2. Computational Details. ....                                                                                                             | 3  |
| 1.3. Synthesis of unsolvated $\text{KB}_3\text{H}_8$ . ....                                                                                  | 3  |
| 1.4. Synthesis of unsolvated $\text{RbB}_3\text{H}_8$ .....                                                                                  | 5  |
| 1.5. Synthesis of unsolvated $\text{CsB}_3\text{H}_8$ . ....                                                                                 | 5  |
| 1.6. Synthesis of unsolvated $\text{Na}(\text{C}_4\text{H}_8\text{O}_2)\text{B}_3\text{H}_8$ .....                                           | 6  |
| 1.7. Reaction of $\text{LiBH}_4$ with $\text{DMS}\cdot\text{BH}_3$ at 76 °C. ....                                                            | 7  |
| 1.8. Reaction of $\text{LiBH}_4$ with $\text{DMS}\cdot\text{BH}_3$ at 66 °C. ....                                                            | 8  |
| 1.9. The capture of the $\text{B}_2\text{H}_6$ intermediate formed in the reaction of $\text{DMS}\cdot\text{BH}_3$ with $\text{KBH}_4$ ..... | 8  |
| 1.10. Influencing factors on the reaction of $\text{KBH}_4$ and $\text{DMS}\cdot\text{BH}_3$ .....                                           | 8  |
| 2. Mechanisms .....                                                                                                                          | 10 |
| 3. Cartesian coordinates and Vibrational frequencies of all the computed systems....                                                         | 13 |
| 3.1. Solvent: 1,4-dioxane. ....                                                                                                              | 13 |
| 3.2. Solvent: THF.....                                                                                                                       | 39 |

## 1. Experimental Section

**1.1. General Remarks.** All manipulations were carried out on a Schlenk line or in a glovebox filled with high-purity nitrogen. The  $^{11}\text{B}$  NMR spectra were obtained at 193 MHz and externally referenced to  $\text{BF}_3 \cdot \text{OEt}_2$  in  $\text{C}_6\text{D}_6$  ( $\delta = 0.00$  ppm). The  $^1\text{H}$  NMR and  $^1\text{H}\{^{11}\text{B}\}$  NMR spectra were obtained at 600 MHz.

Chemicals of  $\text{LiBH}_4$ ,  $\text{NaBH}_4$ ,  $\text{KBH}_4$  were purchased from Sigma-Aldrich, and the  $\text{RbBH}_4$  and  $\text{CsBH}_4$  were received from United Boron (Zhengzhou) Energy Materials S&T LLC.  $\text{DMS} \cdot \text{BH}_3$  was purchased from Sinopharm Chemical Reagent Co., Ltd and used as received. 1,4-dioxane, THF, dimethoxyethane (DME), diethyl ether ( $\text{Et}_2\text{O}$ ), and toluene were dried over sodium/benzophenone and freshly distilled prior to use. Dichloromethane ( $\text{CH}_2\text{Cl}_2$ ) was dried over calcium hydride.

**1.2. Computational Details.** The M06-2X calculations were performed using the Gaussian 09 program. Basis set 6-311++G(d, p) was employed for all atoms involved in the model reaction. The solvent effect was considered by using the SMD model in dioxane solvent for all kinds of calculations. After the structural optimizations for all the stationary points, frequency calculations at the same level of theory were carried out to identify all of the stationary points as minima (zero imaginary frequency) or transition state (only one frequency), and to provide corrections for free energies.

**1.3. Synthesis of unsolvated  $\text{KB}_3\text{H}_8$ .** Potassium borohydride (0.54 g, 10 mmol) was added to a 50 mL flask, and then 8 mL 1,4-dioxane and 10 M  $\text{DMS} \cdot \text{BH}_3$  (2 mL, 20 mmol) was condensed into the flask. The reaction mixture was heated at 90 °C under stirring for 48 h (Fig. S1, S2). After reaction, the precipitate was separated by filtration and dried under dynamic vacuum. Then THF (40 mL) was injected into the flask, and stirred 20 mins to extract the  $\text{KB}_3\text{H}_8$  product. Removal of THF from filtrate resulted in a sticky solid, into which  $\text{CH}_2\text{Cl}_2$  (20 mL) was added to produce white precipitate. The precipitate was filtered, washed with  $\text{CH}_2\text{Cl}_2$  ( $2 \times 20$  mL), and then dried under dynamic vacuum to produce a free-flowing unsolvated  $\text{KB}_3\text{H}_8$  white powder. (NMR yield of about 94%, isolated yield of 0.71 g, 89% (Fig. S3).  $^{11}\text{B}$  NMR (193 MHz,  $\text{CD}_3\text{CN}$ ):  $\delta$  -30.0 (nonet,  $J = 33$  Hz) ppm.  $^1\text{H}$  NMR (600 MHz,  $\text{CD}_3\text{CN}$ ):  $\delta$  0.14 (decet,  $J = 33$  Hz, 8H of  $\text{B}_3\text{H}_8^-$ ) ppm.)

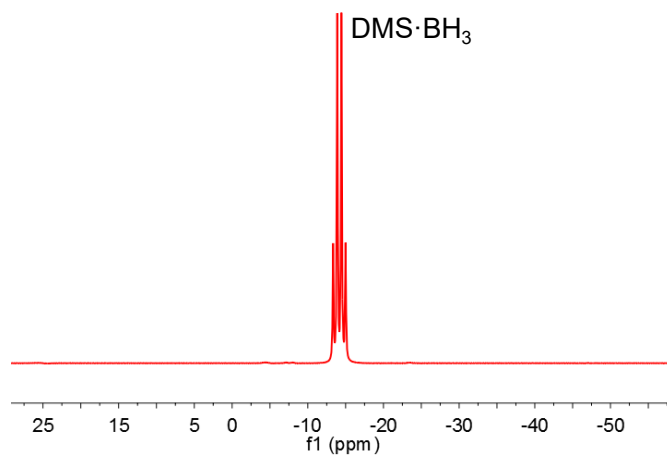

Fig. S1 The  $^{11}\text{B}$  NMR spectrum of the reaction mixtures of  $\text{KBH}_4$  and  $\text{DMS}\cdot\text{BH}_3$  reacted for 48 hours at  $90^\circ\text{C}$

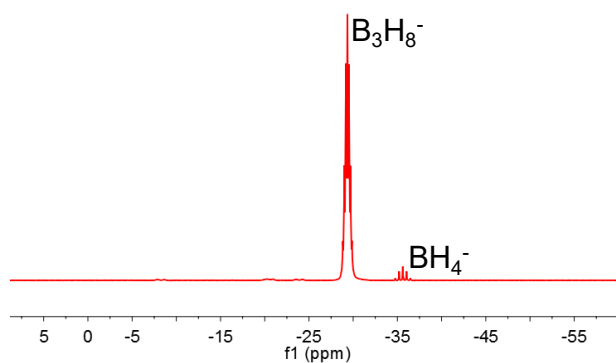

Fig. S2 The  $^{11}\text{B}$  NMR spectrum of the precipitate, from the reaction of  $\text{KBH}_4$  and  $\text{DMS}\cdot\text{BH}_3$  at  $90^\circ\text{C}$  for 48 hours, in DMSO

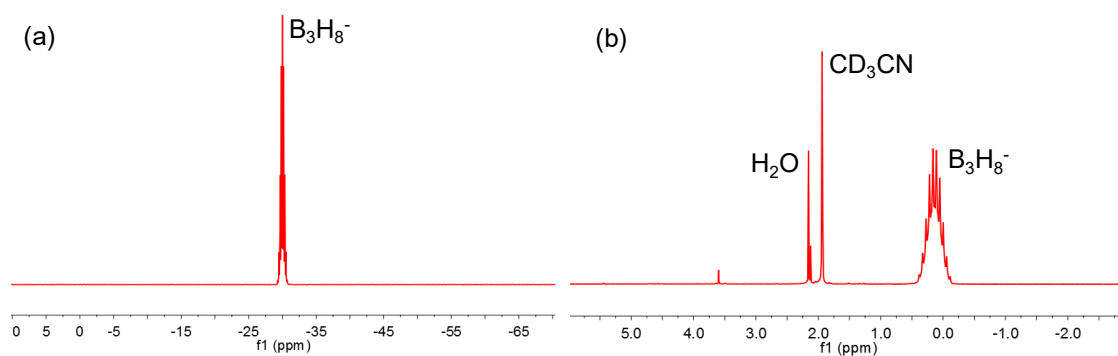

Fig. S3 The  $^{11}\text{B}$  NMR (a) and  $^1\text{H}$  NMR (b) spectra of the unsolvated  $\text{KB}_3\text{H}_8$  in  $\text{CD}_3\text{CN}$

**1.4. Synthesis of unsolvated RbB<sub>3</sub>H<sub>8</sub>.** Rubidium borohydride (1.0 g, 10 mmol) was added to a 50 mL flask, and then 8 mL 1,4-dioxane and 10 M DMS·BH<sub>3</sub> (2 mL, 20 mmol) was condensed into the flask. The reaction mixture was heated at 90 °C under stirring for 48 h. After reaction, the precipitate was separated by filtration and dried under dynamic vacuum. Then THF (40 mL) was injected into the flask, and stirred 20 mins to extract the RbB<sub>3</sub>H<sub>8</sub> product. Removal of THF from filtrate resulted in a sticky solid, into which CH<sub>2</sub>Cl<sub>2</sub> (20 mL) was added to produce white precipitate. The precipitate was filtered, washed with CH<sub>2</sub>Cl<sub>2</sub> (2 × 20 mL), and then dried under dynamic vacuum to produce a free-flowing unsolvated RbB<sub>3</sub>H<sub>8</sub> white powder. (NMR yield of about 92%, isolated yield of 1.01 g, 80% (Fig. S4). <sup>11</sup>B NMR (193 MHz, CD<sub>3</sub>CN): δ -30.6 (nonet, J = 33 Hz) ppm. <sup>1</sup>H NMR (600 MHz, CD<sub>3</sub>CN): δ 0.14 (decet, J = 33 Hz, 8H of B<sub>3</sub>H<sub>8</sub><sup>-</sup>) ppm.)

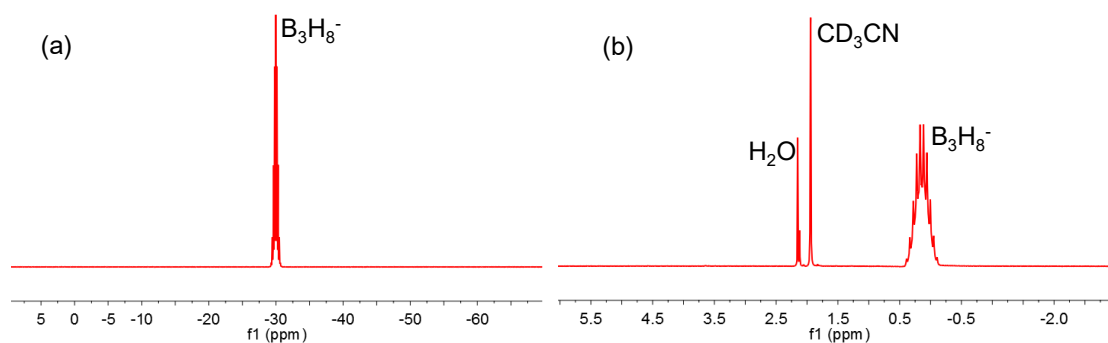

Fig. S4 The <sup>11</sup>B NMR (a) and <sup>1</sup>H NMR (b) spectra of the unsolvated RbB<sub>3</sub>H<sub>8</sub> in CD<sub>3</sub>CN

**1.5. Synthesis of unsolvated CsB<sub>3</sub>H<sub>8</sub>.** Cesium borohydride (1.48 g, 10 mmol) was added to a 50 mL flask, and then 8 mL 1,4-dioxane and 10 M DMS·BH<sub>3</sub> (2 mL, 20 mmol) was condensed into the flask. The reaction mixture was heated at 90 °C under stirring for 48 h. After reaction, the precipitate was separated by filtration and dried under dynamic vacuum. Then THF (40 mL) was injected into the flask, and stirred 20 mins to extract the CsB<sub>3</sub>H<sub>8</sub> product. Removal of THF from filtrate resulted in a sticky solid, into which CH<sub>2</sub>Cl<sub>2</sub> (20 mL) was added to produce white precipitate. The precipitate was filtered, washed with CH<sub>2</sub>Cl<sub>2</sub> (2 × 20 mL), and then dried under

dynamic vacuum to produce a free-flowing unsolvated  $\text{CsB}_3\text{H}_8$  white powder. (NMR yield of about 92%, isolated yield of 1.44g, 83% (Fig. S5).  $^{11}\text{B}$  NMR (193 MHz,  $\text{CD}_3\text{CN}$ ):  $\delta$  -30.5 (nonet,  $J = 33$  Hz) ppm.  $^1\text{H}$  NMR (600 MHz,  $\text{CD}_3\text{CN}$ ):  $\delta$  0.15 (decet,  $J = 33$  Hz, 8H of  $\text{B}_3\text{H}_8^-$ ) ppm.)

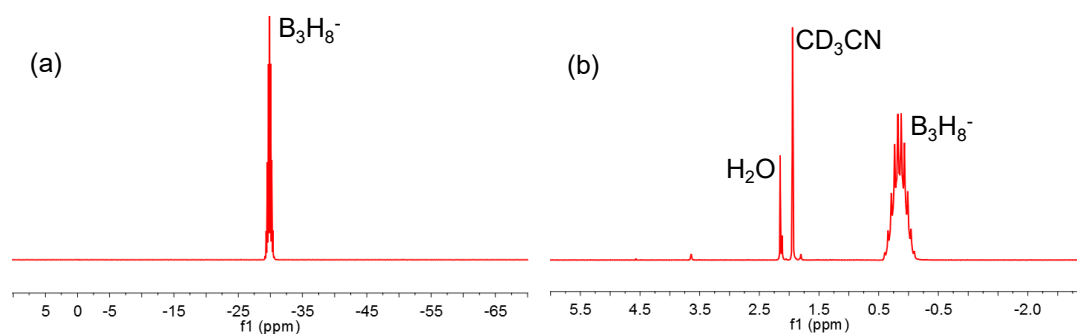

Fig. S5 The  $^{11}\text{B}$  NMR (a) and  $^1\text{H}$  NMR (b) spectra of the unsolvated  $\text{CsB}_3\text{H}_8$  in  $\text{CD}_3\text{CN}$

**1.6. Synthesis of unsolvated  $\text{Na}(\text{C}_4\text{H}_8\text{O}_2)\text{B}_3\text{H}_8$ .** Sodium borohydride (0.38 g, 10 mmol) was added to a 50 mL flask, and then 8 mL 1,4-dioxane and 10 M  $\text{DMS}\cdot\text{BH}_3$  (2 mL, 20 mmol) was condensed into the flask. The reaction mixture was heated at 90 °C under stirring for 48 h. After reaction, the precipitate was separated by filtration and dried under dynamic vacuum. Then THF (40 mL) was injected into the flask. Water (1.0 mL) was injected into the solution to destroy the residue  $\text{NaBH}_4$ . After filtration, THF was removed from the filtrate under dynamic vacuum resulted in a sticky solid, into which  $\text{CH}_2\text{Cl}_2$  (20 mL) was added to produce white precipitate. The precipitate was filtered, washed with  $\text{CH}_2\text{Cl}_2$  ( $2 \times 20$  mL), and then dried under dynamic vacuum to produce  $\text{Na}(\text{C}_4\text{H}_8\text{O}_2)\text{B}_3\text{H}_8$  white powder. (NMR yield of about 97%, isolated yield of 1.24 g, 82% (Fig. S6).  $^{11}\text{B}$  NMR (193 MHz,  $\text{CD}_3\text{CN}$ ):  $\delta$  -29.9 (nonet,  $J = 33$  Hz) ppm.  $^1\text{H}$  NMR (600 MHz,  $\text{CD}_3\text{CN}$ ):  $\delta$  0.14 (decet,  $J = 33$  Hz, 8H of  $\text{B}_3\text{H}_8^-$ ), 3.60 (s, 8H of  $\text{C}_4\text{H}_8\text{O}_2$ ) ppm.)

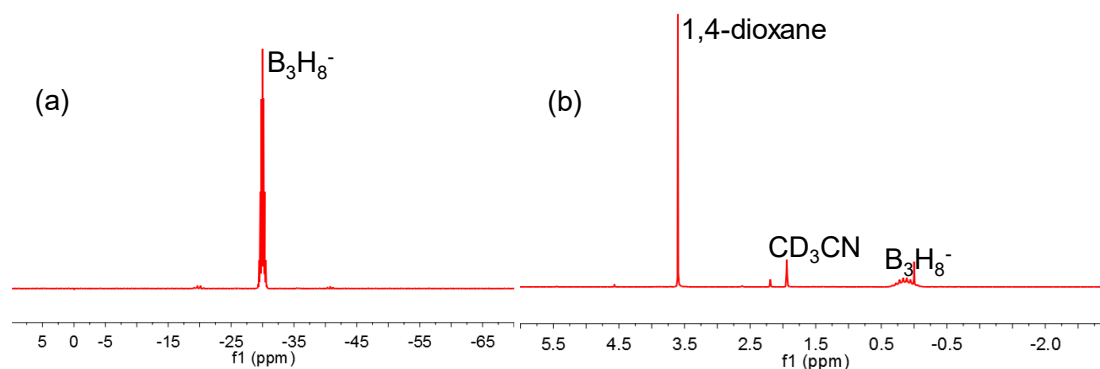

Fig. S6 The  $^{11}\text{B}$  NMR (a) and  $^1\text{H}$  NMR (b) spectra of  $\text{Na}(\text{C}_4\text{H}_8\text{O}_2)\text{B}_3\text{H}_8$  in  $\text{CD}_3\text{CN}$

**1.7. Reaction of  $\text{LiBH}_4$  with  $\text{DMS}\cdot\text{BH}_3$  at  $76^\circ\text{C}$ .** Lithium borohydride (0.22 g, 10 mmol) was added to a 50 mL flask, and then 8 mL 1,4-dioxane and 10 M  $\text{DMS}\cdot\text{BH}_3$  (2 mL, 20 mmol) was condensed into the flask. The reaction mixture was heated at  $76^\circ\text{C}$  under stirring for 48 h. After reaction, the solvent was removed under dynamic vacuum. Then THF (40 mL) was injected into the flask. Water (2.0 mL) was injected into the solution to destroy the residue  $\text{LiBH}_4$ . After filtration, THF was removed from the filtrate under dynamic vacuum resulted in a sticky solid, into which  $\text{CH}_2\text{Cl}_2$  (20 mL) was added to produce white precipitate. The precipitate was filtered, washed with  $\text{CH}_2\text{Cl}_2$  ( $2 \times 20$  mL), and then dried under dynamic vacuum to produce white powder. The white powder was dissolved in DMSO to test by  $^{11}\text{B}$  NMR (Fig. S7).

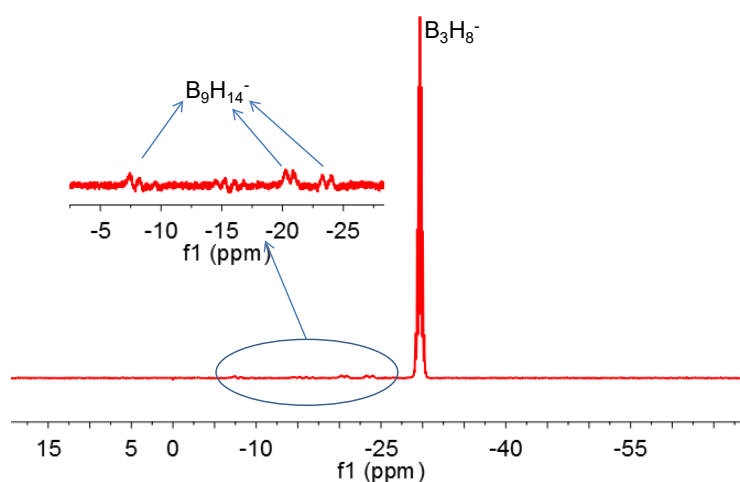

Fig. S7 The  $^{11}\text{B}$  NMR spectrum of the white solid obtained from the reaction  $\text{LiBH}_4$  with  $\text{DMS}\cdot\text{BH}_3$  at  $76^\circ\text{C}$

**1.8. Reaction of LiBH<sub>4</sub> with DMS·BH<sub>3</sub> at 66 °C.** Lithium borohydride (0.22 g, 10 mmol) was added to a 50 mL flask, and then 8 mL 1,4-dioxane and 10 M DMS·BH<sub>3</sub> (2 mL, 20 mmol) was condensed into the flask. The reaction mixture was heated at 66°C under stirring for 48 h. After reaction, the solvent was removed under dynamic vacuum. Then THF (40 mL) was injected into the flask. Water (2.0 mL) was injected into the solution to destroy the residue LiBH<sub>4</sub>. After filtration, THF was removed from the filtrate under dynamic vacuum resulted in a sticky solid, into which CH<sub>2</sub>Cl<sub>2</sub> (20 mL) was added to produce white precipitate. The precipitate was filtered, washed with CH<sub>2</sub>Cl<sub>2</sub> (2 × 20 mL), and then dried under dynamic vacuum to produce Li(C<sub>4</sub>H<sub>8</sub>O<sub>2</sub>)B<sub>3</sub>H<sub>8</sub> white powder. (NMR yield of about 57%, isolated yield of 0.69 g, 51% (Fig. S8). <sup>11</sup>B NMR (193 MHz, CD<sub>3</sub>CN): δ -29.98 (nonet, J = 33 Hz) ppm. <sup>1</sup>H NMR (600 MHz, CD<sub>3</sub>CN): δ 0.14 (decet, J = 33 Hz, 8H of B<sub>3</sub>H<sub>8</sub><sup>-</sup>), 3.60 (s, 8H of C<sub>4</sub>H<sub>8</sub>O<sub>2</sub>) ppm.)

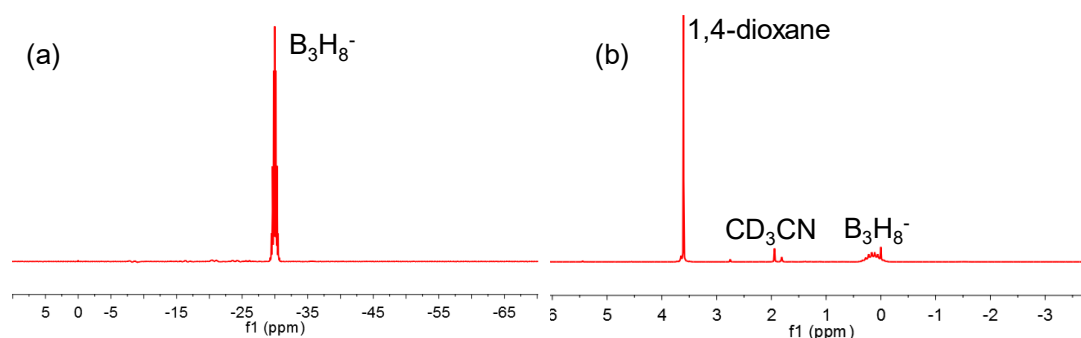

Fig. S8 The <sup>11</sup>B NMR (a) and <sup>1</sup>H NMR (b) spectra of Li(C<sub>4</sub>H<sub>8</sub>O<sub>2</sub>)B<sub>3</sub>H<sub>8</sub> in CD<sub>3</sub>CN

**1.9. The capture of the B<sub>2</sub>H<sub>6</sub> intermediate formed in the reaction of DMS·BH<sub>3</sub> with KBH<sub>4</sub>.** Potassium borohydride (0.54 g, 10 mmol) was added to a 50 mL flask, and then 8 mL 1,4-dioxane and 10 M DMS·BH<sub>3</sub> (2 mL, 20 mmol) was condensed into the flask. The reaction mixture was heated at 90 °C under stirring for 20 mins and the forming gases were condensed by ice-water in condenser and then trapped by Et<sub>2</sub>O. The trapped Et<sub>2</sub>O solution was examined by <sup>11</sup>B NMR (Fig. 3).

**1.10. Influencing factors on the reaction of KBH<sub>4</sub> and DMS·BH<sub>3</sub>.** Similar procedures were performed for synthesis of KB<sub>3</sub>H<sub>8</sub> by KBH<sub>4</sub> with different concentrations of DMS·BH<sub>3</sub> solutions at different temperature in different solvents (Table S1).



Table S1 The yield of  $\text{KB}_3\text{H}_8$  in different reaction conditions

| $c(\text{DMS}\cdot\text{BH}_3)$<br>(M) | Solvent     | Reaction conditions | Yield based on<br>NMR integration<br>(%) |
|----------------------------------------|-------------|---------------------|------------------------------------------|
| 2.0                                    | 1,4-dioxane | 66 °C, 48 h         | 25                                       |
| 2.0                                    | 1,4-dioxane | 75 °C, 48 h         | 38                                       |
| 2.0                                    | 1,4-dioxane | 85 °C, 48 h         | 79                                       |
| 2.0                                    | 1,4-dioxane | 90 °C, 48 h         | 94                                       |
| 2.0                                    | 1,4-dioxane | reflux, 24 h        | -- <sup>a</sup>                          |
| 0.5                                    | 1,4-dioxane | 90 °C, 48 h         | 63                                       |
| 4.0                                    | 1,4-dioxane | 90 °C, 48 h         | 85                                       |
| 2.0 (20% excess)                       | 1,4-dioxane | 90 °C, 48 h         | 97                                       |
| 2.0                                    | toulene     | 90 °C, 48 h         | --                                       |
| 2.0                                    | THF         | reflux, 48 h        | --                                       |

**NOTE:** The by-product  $\text{SMe}_2$  gas produced in the reaction is passed through to the aqueous solution of  $\text{NaClO}$  for harmless treatment.

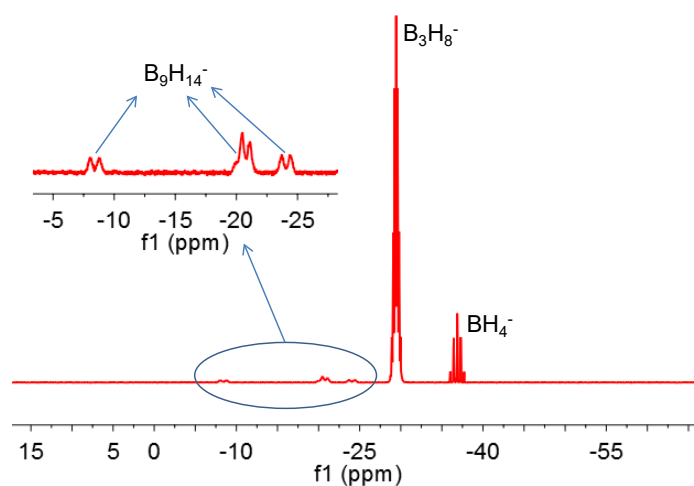

Fig. S9 The  $^{11}\text{B}$  NMR spectrum of the reaction precipitate of  $\text{KBH}_4$  and  $\text{DMS}\cdot\text{BH}_3$  reacted at reflux for 24 hours in  $\text{DMSO}^a$

## 2. Mechanisms

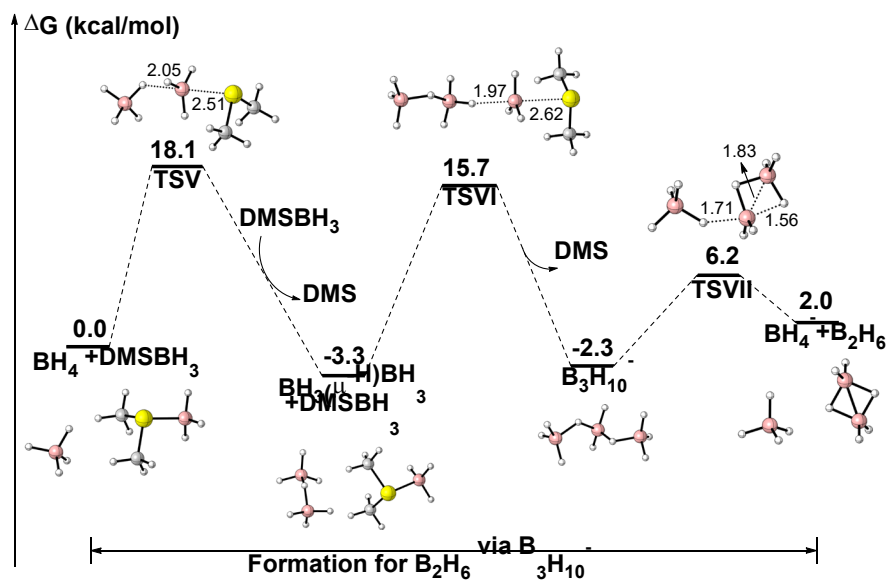

Fig. S10 Energy profile for the formation of  $B_3H_{10}^-$  and then divided to  $BH_4^-$  and  $B_2H_6$  in 1,4-dioxane

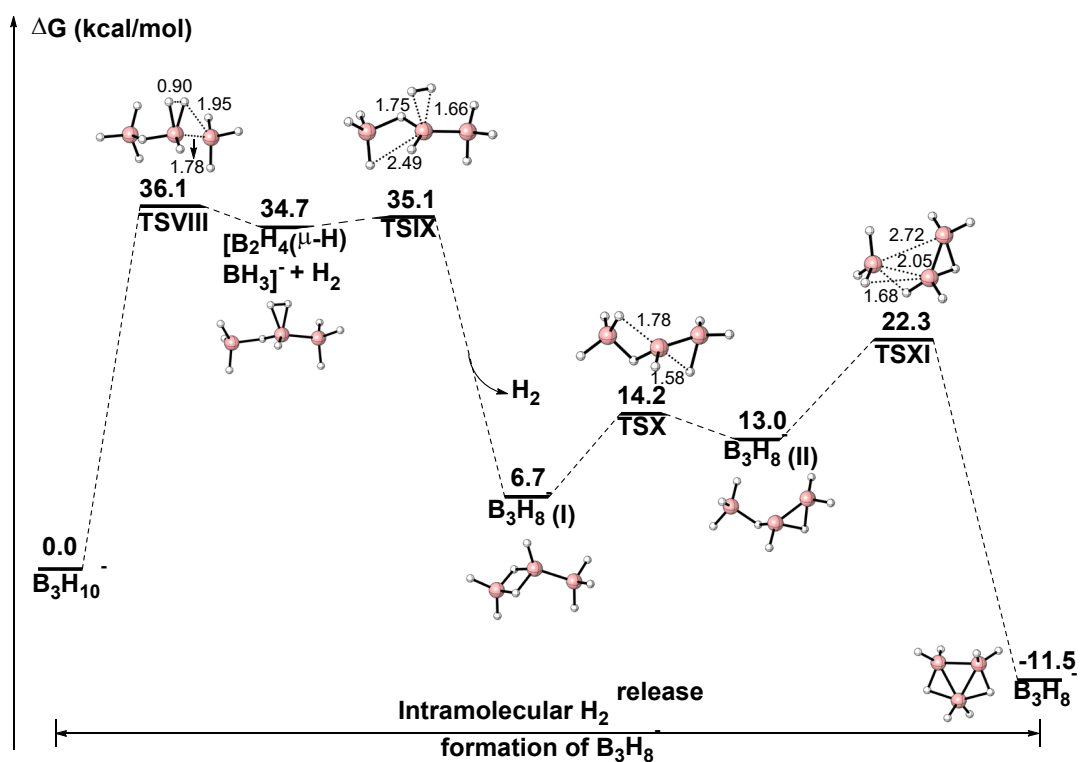

Fig. S11 Energy profile for the transformation from  $B_3H_{10}^-$  to  $B_3H_8^-$  via intramolecular  $H_2$  release in 1,4-dioxane

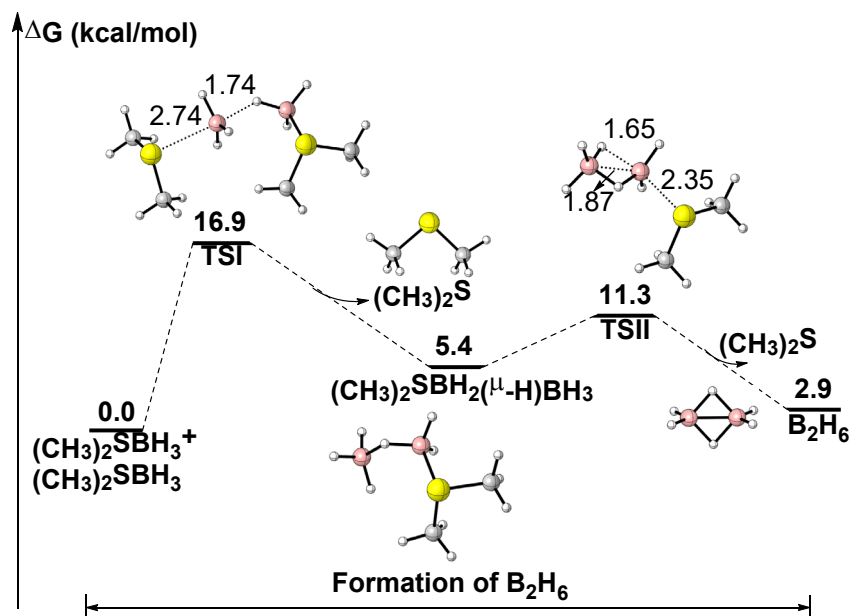

Fig. S12 Energy profile for the transformation from  $(\text{CH}_3)_2\text{S}\cdot\text{BH}_3$  to  $\text{B}_2\text{H}_6$  in THF

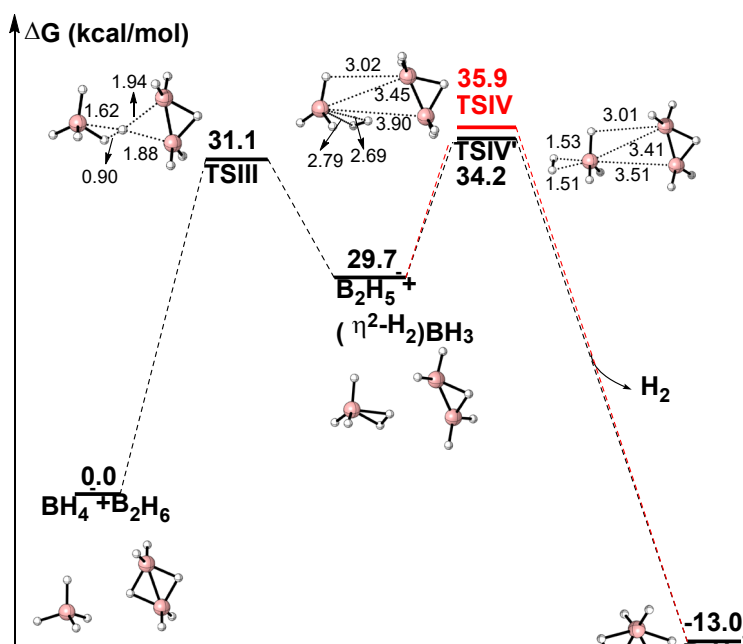

Fig. S13 Energy profile for the transformation from  $\text{BH}_4^-$  and  $\text{B}_2\text{H}_6$  to  $\text{B}_3\text{H}_8^-$  via intermolecular  $\text{H}_2$  release in THF

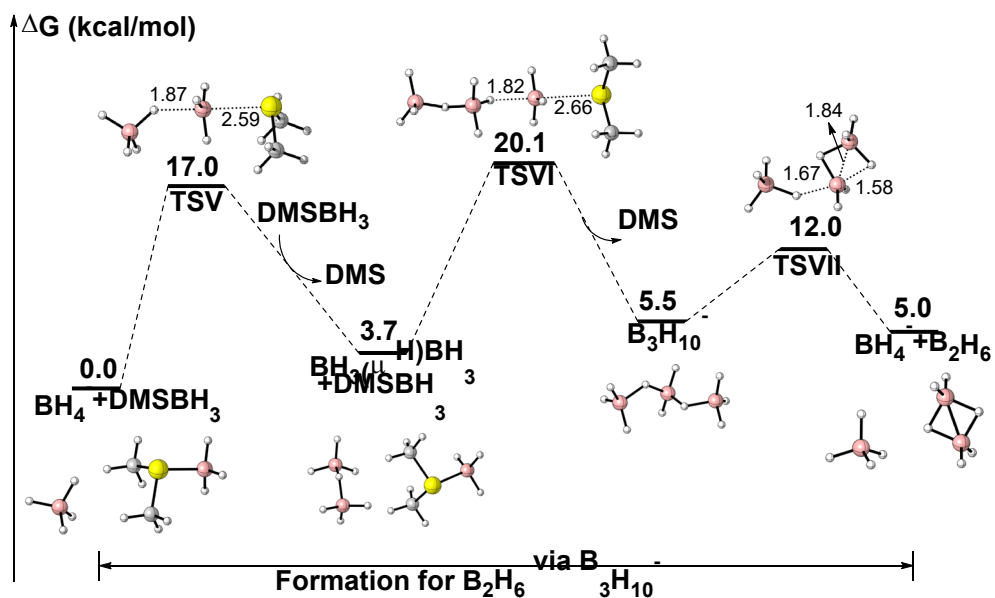

Fig. S14 Energy profile for the formation of  $B_3H_{10}^-$  and then divided to  $BH_4^-$  and  $B_2H_6$  in THF

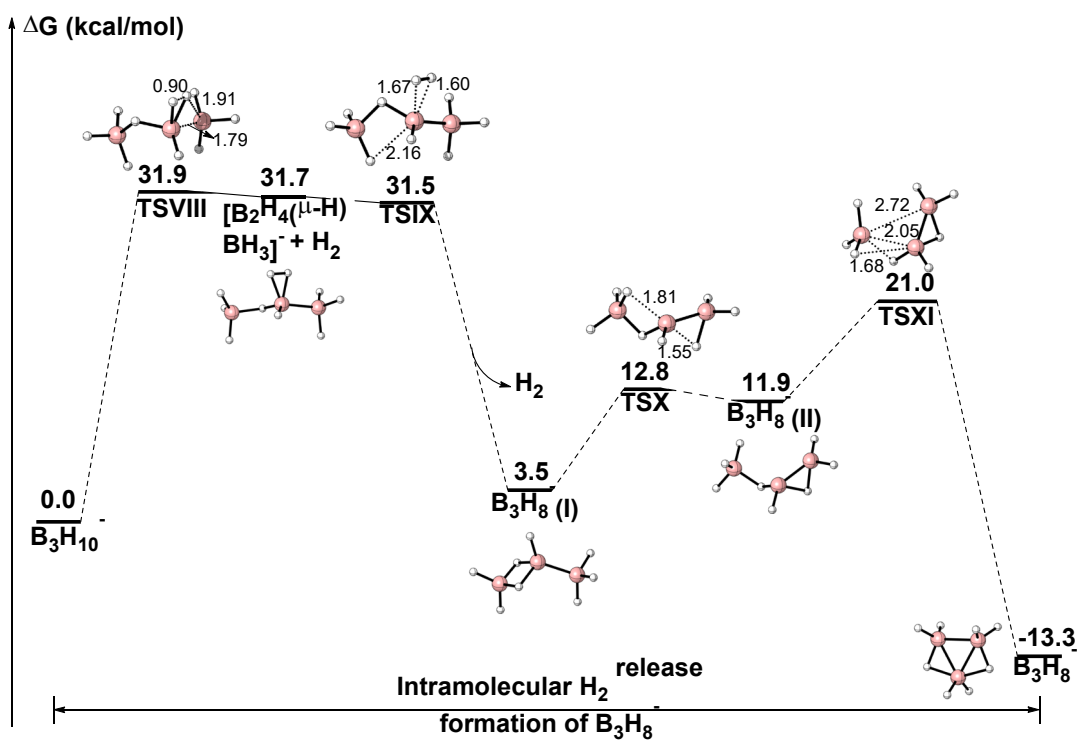

Fig. S15 Energy profile for the transformation from  $B_3H_{10}^-$  to  $B_3H_8^-$  via intramolecular  $H_2$  release in THF

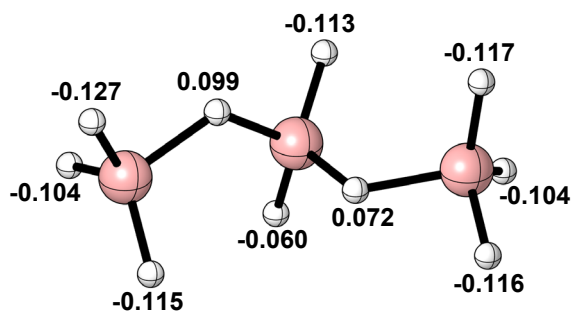

Fig. S16 Mulliken charge analysis for  $B_3H_{10}^-$  in 1,4-dioxane.

### 3. Cartesian coordinates and Vibrational frequencies of all the computed systems

#### 3.1. Solvent: 1,4-dioxane.

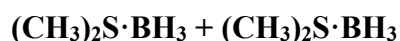

Zero-point correction = 0.217746

Thermal correction to Energy = 0.233312

Thermal correction to Enthalpy = 0.234257

Thermal correction to Gibbs Free Energy = 0.174477

Sum of electronic and zero-point Energies = -1009.024889

Sum of electronic and thermal Energies = -1009.009323

Sum of electronic and thermal Enthalpies = -1009.008378

Sum of electronic and thermal Free Energies = -1009.068158

Cartesian coordinates

|   |           |           |           |
|---|-----------|-----------|-----------|
| S | -1.898499 | 0.060501  | -0.198325 |
| C | -3.551714 | 0.587244  | -0.697514 |
| H | -4.243041 | 0.466075  | 0.136891  |
| H | -3.489877 | 1.641040  | -0.968543 |
| H | -3.877002 | 0.007427  | -1.561370 |
| C | -2.274227 | -1.595754 | 0.409513  |
| H | -2.583544 | -2.227131 | -0.423237 |
| H | -1.357501 | -1.990249 | 0.845279  |
| H | -3.054271 | -1.532481 | 1.169337  |
| B | -1.624900 | 1.098008  | 1.453247  |
| H | -1.474741 | 2.224453  | 1.047203  |
| H | -2.629991 | 0.922880  | 2.096376  |
| H | -0.631629 | 0.615268  | 1.934562  |
| S | 2.653722  | -0.103410 | -0.568327 |
| C | 3.319157  | 0.216030  | 1.078533  |
| H | 2.495888  | 0.293610  | 1.789619  |
| H | 3.954029  | -0.629661 | 1.342202  |

|   |          |           |           |
|---|----------|-----------|-----------|
| H | 3.912831 | 1.129785  | 1.065790  |
| C | 1.532918 | 1.304805  | -0.716428 |
| H | 2.113411 | 2.225754  | -0.777358 |
| H | 0.964921 | 1.170900  | -1.636691 |
| H | 0.860853 | 1.327258  | 0.142280  |
| B | 1.431175 | -1.607461 | -0.224497 |
| H | 2.176131 | -2.529058 | -0.008846 |
| H | 0.791720 | -1.244356 | 0.730836  |
| H | 0.800058 | -1.711645 | -1.246260 |

Vibrational frequencies

|           |           |           |
|-----------|-----------|-----------|
| 29.7891   | 54.9280   | 63.9298   |
| 82.3308   | 87.3940   | 99.9359   |
| 114.3233  | 170.1345  | 178.5932  |
| 199.2026  | 210.1937  | 220.3489  |
| 229.4337  | 237.3768  | 253.9819  |
| 263.3499  | 296.2838  | 306.4643  |
| 496.5079  | 502.0828  | 722.0340  |
| 722.9590  | 762.1152  | 762.7927  |
| 811.4589  | 812.9341  | 825.5034  |
| 836.0940  | 942.7708  | 958.4776  |
| 1001.6910 | 1006.4505 | 1026.5187 |
| 1030.0271 | 1066.3014 | 1077.8660 |
| 1113.7023 | 1118.8354 | 1174.9632 |
| 1177.8686 | 1182.4321 | 1189.9948 |
| 1358.5504 | 1364.5627 | 1384.4620 |
| 1393.9690 | 1455.0530 | 1457.6757 |
| 1459.7175 | 1460.6325 | 1467.4442 |
| 1469.8800 | 1470.4625 | 1481.5174 |
| 2492.8851 | 2502.0695 | 2551.5067 |
| 2560.8321 | 2566.1094 | 2573.3636 |
| 3065.8895 | 3068.2827 | 3072.2536 |
| 3074.7931 | 3166.2387 | 3167.5896 |
| 3171.3790 | 3173.3896 | 3174.4070 |
| 3180.2010 | 3184.0474 | 3189.8994 |

**TSI**

Zero-point correction = 0.216778

Thermal correction to Energy = 0.231854

Thermal correction to Enthalpy = 0.232798

Thermal correction to Gibbs Free Energy = 0.172860

Sum of electronic and zero-point Energies = -1008.998593

Sum of electronic and thermal Energies = -1008.983517

Sum of electronic and thermal Enthalpies = -1008.982572

Sum of electronic and thermal Free Energies = -1009.042511

Cartesian coordinates

|   |           |           |           |
|---|-----------|-----------|-----------|
| S | 2.628533  | 0.005608  | -0.490327 |
| C | 4.292019  | 0.173908  | 0.194334  |
| H | 4.245352  | 0.144778  | 1.283663  |
| H | 4.878481  | -0.669000 | -0.170633 |
| H | 4.736331  | 1.107014  | -0.152409 |
| C | 1.822837  | 1.382348  | 0.357852  |
| H | 2.349129  | 2.304938  | 0.108416  |
| H | 0.797566  | 1.436144  | -0.002580 |
| H | 1.833759  | 1.201967  | 1.433207  |
| B | 2.020861  | -1.602386 | 0.465672  |
| H | 2.831492  | -2.427867 | 0.138115  |
| H | 2.007816  | -1.303783 | 1.629539  |
| H | 0.929504  | -1.874866 | -0.002666 |
| S | -3.088941 | 0.080069  | -0.634185 |
| C | -2.766562 | 1.560906  | 0.353018  |
| H | -2.109983 | 1.322256  | 1.192116  |
| H | -2.274750 | 2.290005  | -0.292093 |
| H | -3.699028 | 1.992694  | 0.721522  |
| C | -3.780409 | -0.969600 | 0.666462  |
| H | -4.697895 | -0.536927 | 1.069383  |
| H | -4.010772 | -1.937687 | 0.220329  |
| H | -3.048687 | -1.116416 | 1.464885  |
| B | -0.602834 | -1.027155 | -0.298055 |
| H | -0.162544 | -0.438217 | -1.239505 |
| H | -0.648259 | -0.498760 | 0.771634  |
| H | -1.088432 | -2.104774 | -0.448823 |

Vibrational frequencies

|           |           |           |
|-----------|-----------|-----------|
| -303.7202 | 7.9624    | 50.6373   |
| 58.4103   | 78.3694   | 96.4130   |
| 119.8758  | 169.0183  | 190.4359  |
| 206.8845  | 215.8095  | 225.1656  |
| 237.6807  | 249.8648  | 257.2042  |
| 262.5386  | 283.1542  | 289.9659  |
| 308.1426  | 507.6256  | 711.6402  |
| 719.9678  | 723.6710  | 756.4706  |
| 775.2826  | 793.5005  | 816.6181  |
| 847.6789  | 942.9998  | 952.6281  |
| 974.1685  | 991.7954  | 1006.8417 |
| 1020.6083 | 1047.2841 | 1069.9495 |
| 1075.7417 | 1108.5514 | 1144.8733 |
| 1170.2209 | 1173.0098 | 1194.0191 |

|           |           |           |
|-----------|-----------|-----------|
| 1354.7435 | 1361.4590 | 1380.3874 |
| 1389.0096 | 1454.1848 | 1462.7318 |
| 1464.0280 | 1471.9161 | 1474.8124 |
| 1476.9763 | 1481.7194 | 1490.2776 |
| 2407.4737 | 2546.7792 | 2580.2369 |
| 2603.8932 | 2680.3066 | 2702.2587 |
| 3052.9472 | 3056.4863 | 3065.3054 |
| 3070.0490 | 3141.2415 | 3147.3745 |
| 3152.8631 | 3155.8558 | 3165.3327 |
| 3167.4375 | 3173.0111 | 3190.5949 |

### **(CH<sub>3</sub>)<sub>2</sub>S**

Zero-point correction = 0.076098

Thermal correction to Energy = 0.081057

Thermal correction to Enthalpy = 0.082001

Thermal correction to Gibbs Free Energy = 0.048840

Sum of electronic and zero-point Energies = -477.906394

Sum of electronic and thermal Energies = -477.901435

Sum of electronic and thermal Enthalpies = -477.900491

Sum of electronic and thermal Free Energies = -477.933652

Cartesian coordinates

|   |           |           |           |
|---|-----------|-----------|-----------|
| S | 0.000002  | 0.663616  | -0.000067 |
| C | 1.375005  | -0.514830 | 0.000168  |
| H | 1.355388  | -1.141236 | -0.893311 |
| H | 2.300422  | 0.062263  | 0.000134  |
| H | 1.355297  | -1.140989 | 0.893818  |
| C | -1.375007 | -0.514828 | -0.000064 |
| H | -1.355326 | -1.141138 | 0.893479  |
| H | -2.300422 | 0.062268  | -0.000026 |
| H | -1.355371 | -1.141083 | -0.893648 |

Vibrational frequencies

|           |           |           |
|-----------|-----------|-----------|
| 129.9196  | 173.6567  | 270.8676  |
| 720.8453  | 769.8630  | 944.2806  |
| 953.7349  | 989.2807  | 1072.5360 |
| 1364.3459 | 1388.8889 | 1461.7484 |
| 1468.6425 | 1469.1283 | 1480.9351 |
| 3062.4025 | 3065.2164 | 3147.6068 |
| 3153.5322 | 3157.2381 | 3158.3766 |

### **(CH<sub>3</sub>)<sub>2</sub>BH<sub>2</sub>( $\mu$ -H)BH<sub>3</sub>**

Zero-point correction = 0.141371

Thermal correction to Energy = 0.150388



Thermal correction to Enthalpy = 0.151332  
 Thermal correction to Gibbs Free Energy = 0.108491  
 Sum of electronic and zero-point Energies = -531.093332  
 Sum of electronic and thermal Energies = -531.084315  
 Sum of electronic and thermal Enthalpies = -531.083370  
 Sum of electronic and thermal Free Energies = -531.126212

Cartesian coordinates

|   |           |           |           |
|---|-----------|-----------|-----------|
| S | 0.534186  | -0.002135 | -0.554417 |
| C | 1.941187  | -0.736816 | 0.307982  |
| H | 1.749743  | -0.744509 | 1.381156  |
| H | 2.050542  | -1.757002 | -0.058106 |
| H | 2.839430  | -0.165982 | 0.074802  |
| C | 0.468509  | 1.601335  | 0.275841  |
| H | 1.426108  | 2.102056  | 0.132037  |
| H | -0.323400 | 2.184778  | -0.189692 |
| H | 0.253486  | 1.458601  | 1.334989  |
| B | -0.904986 | -1.060728 | 0.262496  |
| H | -0.657853 | -2.180883 | -0.083690 |
| H | -0.896046 | -0.839175 | 1.430076  |
| H | -1.889203 | -0.805740 | -0.481063 |
| B | -2.801612 | 0.053352  | 0.049412  |
| H | -3.292412 | 0.173348  | -1.043781 |
| H | -2.294907 | 1.050021  | 0.479015  |
| H | -3.437654 | -0.591586 | 0.832451  |

Vibrational frequencies

|           |           |           |
|-----------|-----------|-----------|
| 57.6319   | 104.3746  | 156.6676  |
| 195.2879  | 238.2262  | 253.1808  |
| 273.3920  | 303.2282  | 318.6318  |
| 494.9267  | 576.0991  | 661.5428  |
| 718.3511  | 769.4166  | 801.8739  |
| 886.0937  | 959.8687  | 975.4918  |
| 1007.3090 | 1034.7309 | 1058.4840 |
| 1082.9306 | 1111.1350 | 1163.2709 |
| 1181.0901 | 1191.9548 | 1364.6285 |
| 1393.8396 | 1461.9150 | 1468.7193 |
| 1472.7231 | 1483.2751 | 1654.6571 |
| 2254.2705 | 2531.7760 | 2591.1052 |
| 2598.4484 | 2624.3518 | 2683.9949 |
| 3076.8121 | 3079.5844 | 3178.5404 |
| 3181.2633 | 3187.1017 | 3192.5885 |

**TSII**

Zero-point correction = 0.140729

Thermal correction to Energy = 0.149375  
 Thermal correction to Enthalpy = 0.150319  
 Thermal correction to Gibbs Free Energy = 0.108058  
 Sum of electronic and zero-point Energies = -531.087188  
 Sum of electronic and thermal Energies = -531.078542  
 Sum of electronic and thermal Enthalpies = -531.077598  
 Sum of electronic and thermal Free Energies = -531.119859

Cartesian coordinates

|   |           |           |           |
|---|-----------|-----------|-----------|
| S | 0.674951  | 0.028706  | -0.611661 |
| C | 1.731437  | -1.087925 | 0.334171  |
| H | 1.395514  | -1.122502 | 1.372005  |
| H | 1.643965  | -2.079843 | -0.108849 |
| H | 2.768757  | -0.758208 | 0.278747  |
| C | 0.906313  | 1.545302  | 0.341888  |
| H | 1.925002  | 1.914155  | 0.223653  |
| H | 0.208589  | 2.288846  | -0.044746 |
| H | 0.685960  | 1.355787  | 1.393531  |
| B | -1.304662 | -0.696679 | 0.311445  |
| H | -1.244068 | -1.784173 | -0.161430 |
| H | -0.945717 | -0.441102 | 1.416057  |
| H | -1.779925 | 0.264703  | -0.438264 |
| B | -3.000249 | 0.101973  | -0.009773 |
| H | -3.581398 | -0.172438 | -1.016136 |
| H | -3.228250 | 1.139852  | 0.537396  |
| H | -2.949595 | -0.835106 | 0.769891  |

Vibrational frequencies

|           |           |           |
|-----------|-----------|-----------|
| -381.2251 | 51.7181   | 124.9646  |
| 179.9229  | 232.6957  | 234.1896  |
| 257.4345  | 278.5989  | 302.5361  |
| 376.5940  | 418.0390  | 720.0315  |
| 772.3459  | 790.9506  | 851.5594  |
| 935.6529  | 947.8273  | 981.0179  |
| 1006.3695 | 1023.0932 | 1049.1098 |
| 1075.7072 | 1117.5451 | 1153.4363 |
| 1165.6315 | 1214.0133 | 1358.6956 |
| 1387.2829 | 1463.9503 | 1470.5646 |
| 1478.8182 | 1484.5550 | 1893.6551 |
| 2070.7174 | 2471.7976 | 2586.1840 |
| 2636.0734 | 2649.1683 | 2734.1038 |
| 3068.2730 | 3072.3782 | 3162.5638 |
| 3167.5374 | 3177.3132 | 3178.2049 |

**B<sub>2</sub>H<sub>6</sub>**

Zero-point correction = 0.063297  
 Thermal correction to Energy = 0.066893  
 Thermal correction to Enthalpy = 0.067837  
 Thermal correction to Gibbs Free Energy = 0.040175  
 Sum of electronic and zero-point Energies = -53.190495  
 Sum of electronic and thermal Energies = -53.186899  
 Sum of electronic and thermal Enthalpies = -53.185955  
 Sum of electronic and thermal Free Energies = -53.213616

Cartesian coordinates

|   |           |           |           |
|---|-----------|-----------|-----------|
| B | -0.874206 | 0.000054  | -0.000004 |
| H | -1.450932 | 1.035967  | 0.000105  |
| H | -1.450852 | -1.035932 | -0.000095 |
| B | 0.874195  | 0.000056  | 0.000001  |
| H | 1.450915  | -1.035887 | -0.000135 |
| H | 0.000009  | -0.000179 | -0.980067 |
| H | 0.000028  | -0.000509 | 0.980141  |
| H | 1.450886  | 1.035995  | 0.000067  |

Vibrational frequencies

|           |           |           |
|-----------|-----------|-----------|
| 339.6962  | 822.3794  | 858.7116  |
| 893.8501  | 923.0744  | 954.2852  |
| 994.1610  | 1052.0965 | 1184.4206 |
| 1200.8964 | 1698.2131 | 1876.1596 |
| 2025.1031 | 2177.3636 | 2644.1087 |
| 2662.0912 | 2732.4862 | 2745.1698 |

### **B<sub>2</sub>H<sub>6</sub> + DMS**

Zero-point correction = 0.141197  
 Thermal correction to Energy = 0.151006  
 Thermal correction to Enthalpy = 0.151950  
 Thermal correction to Gibbs Free Energy = 0.106093  
 Sum of electronic and zero-point Energies = -531.099530  
 Sum of electronic and thermal Energies = -531.089721  
 Sum of electronic and thermal Enthalpies = -531.088777  
 Sum of electronic and thermal Free Energies = -531.134634

Cartesian coordinates

|   |           |           |           |
|---|-----------|-----------|-----------|
| B | -2.529183 | 0.674351  | 0.521045  |
| H | -2.939900 | 1.721893  | 0.145986  |
| H | -2.250302 | 0.488669  | 1.660461  |
| B | -2.315847 | -0.631943 | -0.621021 |
| H | -1.905872 | -1.669766 | -0.220302 |
| H | -3.347223 | -0.264872 | 0.122936  |
| H | -1.511892 | 0.334213  | -0.231070 |
| H | -2.595921 | -0.461578 | -1.759651 |

|   |          |           |           |
|---|----------|-----------|-----------|
| S | 1.216896 | -0.185480 | -0.617899 |
| C | 0.950949 | -1.194180 | 0.862983  |
| H | 0.020187 | -0.916326 | 1.361814  |
| H | 0.886314 | -2.236121 | 0.548081  |
| H | 1.785039 | -1.088506 | 1.558811  |
| C | 1.211780 | 1.443315  | 0.175094  |
| H | 2.035341 | 1.532083  | 0.885601  |
| H | 1.337369 | 2.194632  | -0.605318 |
| H | 0.265301 | 1.626504  | 0.690455  |

Vibrational frequencies

|           |           |           |
|-----------|-----------|-----------|
| 55.7420   | 65.6047   | 102.5826  |
| 118.3465  | 146.9369  | 167.5364  |
| 186.4418  | 224.3892  | 276.3940  |
| 377.2749  | 726.4552  | 779.6233  |
| 822.3402  | 863.0774  | 883.4045  |
| 925.3533  | 926.5863  | 963.0506  |
| 969.2289  | 992.5181  | 1002.2251 |
| 1059.3928 | 1066.7070 | 1180.3001 |
| 1198.9484 | 1355.9225 | 1383.9140 |
| 1458.3683 | 1467.6713 | 1476.8312 |
| 1486.7759 | 1687.7276 | 1861.9288 |
| 2034.4978 | 2178.9067 | 2648.3446 |
| 2672.7486 | 2738.7624 | 2761.1686 |
| 3047.3293 | 3053.0879 | 3127.9810 |
| 3134.6778 | 3156.0759 | 3164.9668 |

**BH<sub>4</sub><sup>-</sup> + B<sub>2</sub>H<sub>6</sub>**

Zero-point correction = 0.100114

Thermal correction to Energy = 0.107605

Thermal correction to Enthalpy = 0.108550

Thermal correction to Gibbs Free Energy = 0.069238

Sum of electronic and zero-point Energies = -80.452952

Sum of electronic and thermal Energies = -80.445461

Sum of electronic and thermal Enthalpies = -80.444517

Sum of electronic and thermal Free Energies = -80.483828

Cartesian coordinates

|   |           |           |           |
|---|-----------|-----------|-----------|
| B | -1.264622 | 0.874800  | -0.000254 |
| H | -1.269175 | 1.453761  | 1.035758  |
| H | -1.256720 | 1.453783  | -1.036167 |
| B | -1.308969 | -0.862461 | -0.000230 |
| H | -1.327561 | -1.441860 | -1.035869 |
| H | -0.303275 | -0.019121 | 0.005496  |
| H | -2.276594 | 0.029719  | -0.006184 |

|   |           |           |           |
|---|-----------|-----------|-----------|
| H | -1.339985 | -1.441330 | 1.035456  |
| B | 2.296996  | -0.011812 | 0.000427  |
| H | 1.867898  | -0.581664 | 1.000946  |
| H | 1.869465  | -0.577364 | -1.003195 |
| H | 1.896040  | 1.151921  | 0.002568  |
| H | 3.522887  | -0.030480 | 0.001471  |

Vibrational frequencies

|           |           |           |
|-----------|-----------|-----------|
| 27.9383   | 69.7967   | 181.2808  |
| 182.0792  | 249.0170  | 250.9637  |
| 375.0659  | 835.7208  | 846.6799  |
| 864.8433  | 931.1921  | 962.7164  |
| 979.9143  | 1049.8177 | 1098.7136 |
| 1099.4178 | 1140.0173 | 1188.0877 |
| 1206.7641 | 1235.7456 | 1240.5400 |
| 1675.2478 | 1868.4775 | 2046.1537 |
| 2178.3733 | 2328.7635 | 2363.3530 |
| 2364.9701 | 2366.3696 | 2632.6233 |
| 2653.9540 | 2718.6970 | 2731.5331 |

**TSIII**

Zero-point correction = 0.095190

Thermal correction to Energy = 0.102082

Thermal correction to Enthalpy = 0.103026

Thermal correction to Gibbs Free Energy = 0.065986

Sum of electronic and zero-point Energies = -80.410631

Sum of electronic and thermal Energies = -80.403739

Sum of electronic and thermal Enthalpies = -80.402795

Sum of electronic and thermal Free Energies = -80.439835

Cartesian coordinates

|   |           |           |           |
|---|-----------|-----------|-----------|
| B | -2.080526 | -0.015142 | 0.048494  |
| H | -3.013822 | -0.496207 | -0.550817 |
| H | -1.204848 | -0.750346 | -0.606243 |
| H | -2.013073 | -0.320879 | 1.208264  |
| B | 1.325246  | -0.764886 | 0.019403  |
| H | 2.249210  | 0.206062  | 0.060326  |
| H | 1.390703  | -1.378305 | 1.053470  |
| H | 1.504370  | -1.394519 | -0.993421 |
| H | -1.883833 | 1.145233  | -0.193719 |
| B | 1.056789  | 0.849282  | -0.007211 |
| H | -0.518473 | -0.309973 | -0.249535 |
| H | 1.046429  | 1.469688  | -1.039773 |
| H | 0.935788  | 1.482978  | 1.008015  |

Vibrational frequencies

|           |           |           |
|-----------|-----------|-----------|
| -539.9741 | 57.1641   | 148.4668  |
| 168.5293  | 186.0243  | 254.0511  |
| 515.6843  | 586.7655  | 828.3547  |
| 843.6356  | 886.3191  | 907.6382  |
| 917.9713  | 969.7300  | 998.7431  |
| 1037.3522 | 1047.4033 | 1116.0489 |
| 1171.7279 | 1193.1864 | 1207.5762 |
| 1211.3055 | 1470.2649 | 1832.1339 |
| 1952.9581 | 2412.7778 | 2501.8713 |
| 2519.5269 | 2549.7754 | 2550.8758 |
| 2570.0092 | 2573.4211 | 2596.2888 |

### **B<sub>2</sub>H<sub>5</sub><sup>-</sup> + (η<sup>2</sup>-H<sub>2</sub>)BH<sub>3</sub>**

Zero-point correction = 0.096977

Thermal correction to Energy = 0.104915

Thermal correction to Enthalpy = 0.105859

Thermal correction to Gibbs Free Energy = 0.065964

Sum of electronic and zero-point Energies = -80.410567

Sum of electronic and thermal Energies = -80.402629

Sum of electronic and thermal Enthalpies = -80.401685

Sum of electronic and thermal Free Energies = -80.441580

Cartesian coordinates

|   |           |           |           |
|---|-----------|-----------|-----------|
| B | -2.415583 | -0.003103 | -0.071842 |
| H | -2.852440 | 0.350804  | 0.984616  |
| H | -2.104186 | 0.889500  | -0.810430 |
| H | -2.939412 | -0.935160 | -0.611172 |
| B | 1.303378  | 0.831096  | -0.016361 |
| H | 2.161621  | 0.125886  | 0.772576  |
| H | 1.975701  | 1.609712  | -0.649903 |
| H | 0.493064  | 1.339392  | 0.727125  |
| H | -1.367729 | -0.724353 | 0.427954  |
| B | 1.563066  | -0.769250 | -0.060677 |
| H | -1.018172 | -0.139334 | -0.015863 |
| H | 0.954362  | -1.546021 | 0.644123  |
| H | 2.442887  | -1.264137 | -0.724622 |

Vibrational frequencies

|           |           |           |
|-----------|-----------|-----------|
| 41.2058   | 79.7546   | 130.4665  |
| 170.5267  | 192.6345  | 258.6266  |
| 316.1401  | 517.2804  | 812.9924  |
| 842.1503  | 867.3850  | 884.2475  |
| 899.2136  | 975.0658  | 1035.5638 |
| 1051.0354 | 1112.6055 | 1168.2882 |

|           |           |           |
|-----------|-----------|-----------|
| 1200.7029 | 1206.1421 | 1208.8945 |
| 1278.3465 | 1380.2462 | 1764.8120 |
| 1864.3167 | 2464.7454 | 2496.6612 |
| 2511.3164 | 2532.3866 | 2548.1187 |
| 2621.5823 | 2638.3785 | 3496.0700 |

## TSIV

Zero-point correction = 0.092696

Thermal correction to Energy = 0.100872

Thermal correction to Enthalpy = 0.101816

Thermal correction to Gibbs Free Energy = 0.061785

Sum of electronic and zero-point Energies = -80.397725

Sum of electronic and thermal Energies = -80.389549

Sum of electronic and thermal Enthalpies = -80.388605

Sum of electronic and thermal Free Energies = -80.428636

Cartesian coordinates

|   |           |           |           |
|---|-----------|-----------|-----------|
| B | 2.222241  | 0.100659  | -0.378154 |
| H | 3.157386  | -0.124326 | 0.325846  |
| H | 1.506287  | -0.831206 | 1.932773  |
| H | 1.809628  | -0.749764 | -1.096321 |
| B | -1.362871 | -0.727354 | -0.269404 |
| H | -2.329397 | 0.099855  | 0.225547  |
| H | -1.715043 | -1.044304 | -1.382971 |
| H | -1.251390 | -1.641500 | 0.518218  |
| H | 1.783341  | 1.201782  | -0.437219 |
| B | -1.166752 | 0.820151  | 0.169281  |
| H | 0.845477  | -0.757477 | 1.594388  |
| H | -0.904544 | 1.142672  | 1.306919  |
| H | -1.364832 | 1.736988  | -0.595796 |

Vibrational frequencies

|           |           |           |
|-----------|-----------|-----------|
| -174.6815 | 50.6819   | 90.4421   |
| 115.9542  | 142.1707  | 189.8770  |
| 346.6982  | 366.9844  | 463.5818  |
| 508.5870  | 640.0530  | 800.7006  |
| 831.8881  | 854.6063  | 879.1018  |
| 889.9434  | 972.4630  | 1050.4313 |
| 1127.0912 | 1156.8923 | 1190.9479 |
| 1198.4905 | 1206.4437 | 1352.0073 |
| 1821.3637 | 2459.6811 | 2491.1036 |
| 2497.7188 | 2513.6709 | 2619.0795 |
| 2725.0486 | 2754.9751 | 4380.1410 |

## TSIV'

Zero-point correction = 0.094895  
 Thermal correction to Energy = 0.102303  
 Thermal correction to Enthalpy = 0.103247  
 Thermal correction to Gibbs Free Energy = 0.064897  
 Sum of electronic and zero-point Energies = -80.398078  
 Sum of electronic and thermal Energies = -80.390670  
 Sum of electronic and thermal Enthalpies = -80.389726  
 Sum of electronic and thermal Free Energies = -80.428076

Cartesian coordinates

|   |           |           |           |
|---|-----------|-----------|-----------|
| B | 1.960585  | -0.046589 | 0.040220  |
| H | 1.658115  | 1.107019  | 0.047202  |
| H | 1.856027  | -0.636541 | -1.001897 |
| H | 1.895380  | -0.693795 | 1.044495  |
| B | -1.338100 | 0.821253  | -0.004578 |
| H | -2.468298 | 0.072449  | -0.223637 |
| H | -1.561239 | 1.491407  | 0.980126  |
| H | -1.129386 | 1.445564  | -1.022005 |
| H | 3.452706  | 0.280447  | 0.305234  |
| B | -1.441001 | -0.794949 | 0.011510  |
| H | 3.427296  | -0.088627 | -0.380732 |
| H | -1.298081 | -1.459883 | -0.992498 |
| H | -1.739942 | -1.416617 | 1.007954  |

Vibrational frequencies

|           |           |           |
|-----------|-----------|-----------|
| -147.8064 | 58.3562   | 96.1265   |
| 150.7640  | 170.2758  | 224.5350  |
| 398.9879  | 529.7250  | 550.4395  |
| 789.0794  | 827.2559  | 872.3942  |
| 901.3300  | 903.4423  | 974.2619  |
| 1002.6798 | 1046.5777 | 1157.5967 |
| 1163.4842 | 1166.6592 | 1176.6039 |
| 1206.2585 | 1338.4893 | 1411.4130 |
| 1815.1443 | 2450.2625 | 2480.7155 |
| 2488.0892 | 2501.9815 | 2560.1852 |
| 2642.5798 | 2697.3281 | 3900.9572 |

## H<sub>2</sub>

Zero-point correction = 0.010163 (Hartree/Particle)  
 Thermal correction to Energy = 0.012523  
 Thermal correction to Enthalpy = 0.013467  
 Thermal correction to Gibbs Free Energy = -0.001320  
 Sum of electronic and zero-point Energies = -1.158372  
 Sum of electronic and thermal Energies = -1.156011  
 Sum of electronic and thermal Enthalpies = -1.155067



Sum of electronic and thermal Free Energies = -1.169854

Cartesian coordinates

|   |            |            |             |
|---|------------|------------|-------------|
| H | 0.00000000 | 0.00000000 | 0.37037600  |
| H | 0.00000000 | 0.00000000 | -0.37037600 |

Vibrational frequencies

4460.8708

### **B<sub>3</sub>H<sub>8</sub><sup>-</sup>**

Zero-point correction = 0.083120

Thermal correction to Energy = 0.087968

Thermal correction to Enthalpy = 0.088913

Thermal correction to Gibbs Free Energy = 0.057491

Sum of electronic and zero-point Energies = -79.313443

Sum of electronic and thermal Energies = -79.308595

Sum of electronic and thermal Enthalpies = -79.307651

Sum of electronic and thermal Free Energies = -79.339072

Cartesian coordinates

|   |           |           |           |
|---|-----------|-----------|-----------|
| B | 0.911475  | -0.538304 | 0.000007  |
| H | 1.312036  | -1.027877 | 1.023825  |
| H | 1.312721  | -1.028177 | -1.023434 |
| H | 1.423177  | 0.612652  | 0.000330  |
| B | -0.912136 | -0.537606 | -0.000098 |
| H | 0.001193  | 1.637764  | -1.017620 |
| H | -1.313152 | -1.028527 | -1.023051 |
| H | -1.312604 | -1.025186 | 1.024702  |
| B | 0.000646  | 0.997687  | -0.000150 |
| H | -1.423138 | 0.613698  | -0.001562 |
| H | -0.000158 | 1.636766  | 1.018014  |

Vibrational frequencies

|           |           |           |
|-----------|-----------|-----------|
| 165.5061  | 413.0538  | 538.1598  |
| 539.2852  | 702.6503  | 708.8468  |
| 795.5798  | 798.2173  | 823.2480  |
| 876.1470  | 982.7581  | 1022.2826 |
| 1070.5729 | 1153.2564 | 1160.6709 |
| 1163.3862 | 1193.5773 | 1272.3051 |
| 1423.2711 | 2218.2379 | 2256.0870 |
| 2496.8698 | 2503.6453 | 2536.2649 |
| 2544.9631 | 2552.8580 | 2573.8324 |

### **BH<sub>4</sub><sup>-</sup> + DMS·BH<sub>3</sub>**

Zero-point correction = 0.145446

Thermal correction to Energy = 0.155916

Thermal correction to Enthalpy = 0.156860  
 Thermal correction to Gibbs Free Energy = 0.110983  
 Sum of electronic and zero-point Energies = -531.780166  
 Sum of electronic and thermal Energies = -531.769696  
 Sum of electronic and thermal Enthalpies = -531.768752  
 Sum of electronic and thermal Free Energies = -531.814629

Cartesian coordinates

|   |           |           |           |
|---|-----------|-----------|-----------|
| B | 2.543966  | -0.100499 | -0.138175 |
| H | 2.973096  | -1.128213 | 0.326971  |
| H | 3.064572  | 0.887714  | 0.319853  |
| H | 2.451420  | -0.100281 | -1.343179 |
| S | 0.696657  | -0.005769 | 0.519090  |
| C | -0.127056 | -1.331515 | -0.385050 |
| H | -1.201808 | -1.264491 | -0.211769 |
| H | 0.107079  | -1.238513 | -1.446065 |
| H | 0.264266  | -2.273388 | 0.000060  |
| C | 0.048149  | 1.426541  | -0.364333 |
| H | 0.269528  | 1.321934  | -1.427123 |
| H | -1.025453 | 1.487922  | -0.191715 |
| H | 0.552539  | 2.306378  | 0.034878  |
| B | -3.430411 | 0.003864  | 0.091814  |
| H | -4.474185 | 0.616003  | 0.277596  |
| H | -2.628820 | 0.262415  | 0.989707  |
| H | -3.648438 | -1.204892 | 0.082682  |
| H | -2.944638 | 0.332733  | -0.989234 |

Vibrational frequencies

|           |           |           |
|-----------|-----------|-----------|
| 68.2339   | 113.4201  | 138.7195  |
| 144.1977  | 171.5966  | 209.2355  |
| 234.0038  | 244.9656  | 253.9316  |
| 268.1111  | 286.7615  | 329.7988  |
| 518.3496  | 720.6231  | 760.7719  |
| 807.2701  | 822.7873  | 951.7914  |
| 1016.4346 | 1037.9040 | 1075.0433 |
| 1094.2086 | 1106.1390 | 1111.6850 |
| 1121.2240 | 1173.5967 | 1177.3630 |
| 1235.4422 | 1237.9116 | 1355.1086 |
| 1384.8527 | 1456.2531 | 1466.5408 |
| 1476.6463 | 1484.7030 | 2340.4998 |
| 2342.2970 | 2349.1048 | 2367.1639 |
| 2480.3817 | 2533.6113 | 2542.6500 |
| 3063.1439 | 3066.7790 | 3162.9999 |
| 3168.6000 | 3182.7418 | 3187.7695 |

## TSV

Zero-point correction = 0.143219

Thermal correction to Energy = 0.154097

Thermal correction to Enthalpy = 0.155041

Thermal correction to Gibbs Free Energy = 0.107027

Sum of electronic and zero-point Energies = -531.749518

Sum of electronic and thermal Energies = -531.738640

Sum of electronic and thermal Enthalpies = -531.737696

Sum of electronic and thermal Free Energies = -531.785710

Cartesian coordinates

|   |           |           |           |
|---|-----------|-----------|-----------|
| B | 1.221884  | -0.080768 | 0.586114  |
| H | 1.231572  | -1.185842 | 1.040618  |
| H | 1.342129  | 0.860815  | 1.309450  |
| H | 1.181346  | 0.073465  | -0.596281 |
| S | -1.284867 | -0.001304 | 0.590258  |
| C | -1.482467 | -1.349699 | -0.595655 |
| H | -2.469821 | -1.321555 | -1.059231 |
| H | -0.699703 | -1.290293 | -1.354471 |
| H | -1.369038 | -2.285973 | -0.048833 |
| C | -1.443942 | 1.398618  | -0.541242 |
| H | -0.700867 | 1.315136  | -1.336270 |
| H | -2.450527 | 1.455572  | -0.958583 |
| H | -1.239645 | 2.304266  | 0.030856  |
| B | 4.134668  | 0.024921  | -0.292417 |
| H | 5.227843  | -0.202008 | 0.215951  |
| H | 4.043745  | 1.209872  | -0.590541 |
| H | 3.974659  | -0.677152 | -1.284544 |
| H | 3.261878  | -0.249727 | 0.540646  |

Vibrational frequencies

|           |           |           |
|-----------|-----------|-----------|
| -360.4862 | 51.6089   | 74.2089   |
| 103.7708  | 127.3259  | 147.8130  |
| 162.3973  | 175.3202  | 204.5370  |
| 228.8060  | 254.9828  | 289.3144  |
| 292.7091  | 722.3022  | 753.2036  |
| 775.4403  | 795.0659  | 939.7400  |
| 978.6940  | 1002.7849 | 1009.5598 |
| 1071.5474 | 1088.4097 | 1095.0072 |
| 1116.7266 | 1149.9738 | 1159.3204 |
| 1210.9086 | 1228.1007 | 1360.1697 |
| 1386.5629 | 1459.5887 | 1465.2505 |
| 1476.3569 | 1484.6296 | 2270.0758 |
| 2345.6769 | 2378.6798 | 2382.4595 |
| 2564.2828 | 2664.8924 | 2686.1235 |

|           |           |           |
|-----------|-----------|-----------|
| 3053.6491 | 3059.2980 | 3144.0994 |
| 3151.5339 | 3159.8184 | 3163.2934 |

### DMS·BH<sub>3</sub>

Zero-point correction = 0.107978

Thermal correction to Energy = 0.114999

Thermal correction to Enthalpy = 0.115944

Thermal correction to Gibbs Free Energy = 0.078048

Sum of electronic and zero-point Energies = -504.509704

Sum of electronic and thermal Energies = -504.502683

Sum of electronic and thermal Enthalpies = -504.501738

Sum of electronic and thermal Free Energies = -504.539634

Cartesian coordinates

|   |           |           |           |
|---|-----------|-----------|-----------|
| S | 0.018092  | 0.000506  | -0.544460 |
| C | -0.819648 | 1.372227  | 0.275282  |
| H | -0.698073 | 1.278054  | 1.354938  |
| H | -0.344749 | 2.291725  | -0.066204 |
| H | -1.873614 | 1.380499  | -0.002112 |
| C | -0.794026 | -1.386627 | 0.275025  |
| H | -1.850837 | -1.404660 | 0.009323  |
| H | -0.312871 | -2.298346 | -0.078121 |
| H | -0.661600 | -1.298423 | 1.353899  |
| B | 1.795231  | 0.015459  | 0.310510  |
| H | 2.295170  | 1.028767  | -0.105303 |
| H | 1.553968  | 0.015752  | 1.492635  |
| H | 2.309027  | -0.992357 | -0.102081 |

Vibrational frequencies

|           |           |           |
|-----------|-----------|-----------|
| 95.7667   | 185.4369  | 186.3346  |
| 228.2337  | 243.9873  | 283.1960  |
| 486.7816  | 711.7305  | 750.9414  |
| 809.5419  | 830.8052  | 945.0275  |
| 1003.6213 | 1023.8354 | 1070.3906 |
| 1117.0301 | 1170.8901 | 1173.5013 |
| 1357.8563 | 1385.5886 | 1454.1581 |
| 1459.3071 | 1466.1144 | 1472.2281 |
| 2498.5432 | 2560.7758 | 2573.9040 |
| 3070.9349 | 3073.4169 | 3171.4545 |
| 3172.8803 | 3180.2766 | 3182.2290 |

### BH<sub>3</sub>(μ-H)BH<sub>3</sub> + DMS·BH<sub>3</sub>

Zero-point correction = 0.178233

Thermal correction to Energy = 0.191127

Thermal correction to Enthalpy = 0.192071  
 Thermal correction to Gibbs Free Energy = 0.140179  
 Sum of electronic and zero-point Energies = -558.387745  
 Sum of electronic and thermal Energies = -558.374851  
 Sum of electronic and thermal Enthalpies = -558.373907  
 Sum of electronic and thermal Free Energies = -558.425799

Cartesian coordinates

|   |           |           |           |
|---|-----------|-----------|-----------|
| B | 2.961163  | -0.234924 | 0.323461  |
| H | 3.458125  | -1.017559 | -0.448840 |
| H | 2.686283  | -0.704632 | 1.401669  |
| H | 3.539024  | 0.823592  | 0.375137  |
| S | 1.234804  | 0.211052  | -0.498367 |
| C | 0.442067  | 1.218030  | 0.772718  |
| H | -0.591503 | 1.411874  | 0.486995  |
| H | 0.494251  | 0.694632  | 1.727708  |
| H | 1.001255  | 2.152384  | 0.829408  |
| C | 0.303139  | -1.325583 | -0.328507 |
| H | 0.302436  | -1.637271 | 0.715984  |
| H | -0.712696 | -1.172047 | -0.686693 |
| H | 0.811200  | -2.071322 | -0.940479 |
| B | -2.900603 | 0.798209  | -0.827634 |
| H | -2.956428 | 1.633185  | 0.034265  |
| H | -1.840789 | 0.775678  | -1.417492 |
| H | -3.857000 | 0.790259  | -1.566248 |
| B | -2.986670 | -0.793799 | 0.863708  |
| H | -2.042826 | -0.342776 | 1.459670  |
| H | -2.863880 | -1.978184 | 0.624265  |
| H | -4.062532 | -0.498727 | 1.315566  |
| H | -2.962471 | -0.438028 | -0.399992 |

Vibrational frequencies

|           |           |           |
|-----------|-----------|-----------|
| 46.0507   | 83.0082   | 96.3730   |
| 103.2253  | 138.2876  | 160.3637  |
| 180.4002  | 197.1999  | 216.4816  |
| 236.1592  | 247.3476  | 259.1086  |
| 265.2530  | 292.8322  | 299.7914  |
| 514.3518  | 660.9136  | 720.5202  |
| 764.2854  | 815.9091  | 824.0980  |
| 825.0236  | 883.1109  | 952.4655  |
| 1003.9795 | 1005.7857 | 1027.6298 |
| 1069.4790 | 1071.6756 | 1117.5162 |
| 1130.9658 | 1177.8427 | 1180.8229 |
| 1181.0682 | 1182.2728 | 1189.1500 |
| 1210.2920 | 1352.0579 | 1380.3045 |

|           |           |           |
|-----------|-----------|-----------|
| 1455.0477 | 1462.7444 | 1468.4146 |
| 1476.5120 | 1534.1038 | 2218.9957 |
| 2463.1807 | 2472.1359 | 2486.5447 |
| 2505.9603 | 2536.4998 | 2543.8160 |
| 2547.8099 | 2570.8281 | 2574.2197 |
| 3067.2411 | 3073.6429 | 3168.4296 |
| 3170.6486 | 3181.9990 | 3192.8998 |

## TSVI

Zero-point correction = 0.176309

Thermal correction to Energy = 0.189539

Thermal correction to Enthalpy = 0.190484

Thermal correction to Gibbs Free Energy = 0.136107

Sum of electronic and zero-point Energies = -558.355325

Sum of electronic and thermal Energies = -558.342095

Sum of electronic and thermal Enthalpies = -558.341150

Sum of electronic and thermal Free Energies = -558.395527

Cartesian coordinates

|   |           |           |           |
|---|-----------|-----------|-----------|
| B | 0.431803  | -0.166721 | -0.637541 |
| H | 0.506063  | 0.927530  | -1.104799 |
| H | 0.447591  | -1.123221 | -1.349629 |
| H | 0.357602  | -0.305111 | 0.544804  |
| S | -2.180375 | 0.004020  | -0.587214 |
| C | -2.130962 | 1.432240  | 0.519087  |
| H | -3.084559 | 1.560773  | 1.033828  |
| H | -1.319636 | 1.318092  | 1.240275  |
| H | -1.933474 | 2.313421  | -0.092113 |
| C | -2.437444 | -1.296509 | 0.641783  |
| H | -1.646651 | -1.259433 | 1.393458  |
| H | -3.415847 | -1.201318 | 1.115812  |
| H | -2.380844 | -2.253841 | 0.122760  |
| B | 3.136105  | 0.023894  | 0.311172  |
| H | 2.924392  | 1.145085  | 0.694199  |
| H | 2.400499  | -0.308596 | -0.613084 |
| H | 3.197669  | -0.818575 | 1.163489  |
| B | 5.412797  | -0.025050 | 0.026592  |
| H | 5.931758  | 0.630536  | -0.851918 |
| H | 5.677885  | -1.201211 | -0.032147 |
| H | 5.535778  | 0.462017  | 1.118444  |
| H | 4.194678  | 0.074531  | -0.454291 |

Vibrational frequencies

|           |         |         |
|-----------|---------|---------|
| -336.0714 | 31.1314 | 58.0132 |
|-----------|---------|---------|

|           |           |           |
|-----------|-----------|-----------|
| 79.2067   | 82.8108   | 94.8804   |
| 135.7534  | 146.3690  | 170.7934  |
| 192.8063  | 216.7169  | 218.4847  |
| 228.3522  | 280.8575  | 296.0391  |
| 304.2454  | 654.8202  | 716.2735  |
| 748.0944  | 768.8150  | 795.9792  |
| 835.6973  | 880.7068  | 941.6624  |
| 977.6169  | 1003.7971 | 1010.4764 |
| 1018.9628 | 1071.6302 | 1090.5220 |
| 1128.1145 | 1158.9739 | 1163.9654 |
| 1167.4557 | 1176.8510 | 1190.3762 |
| 1198.3428 | 1359.2340 | 1387.8126 |
| 1463.5150 | 1471.7356 | 1476.6688 |
| 1484.6130 | 1569.7336 | 2193.7822 |
| 2350.9037 | 2473.6096 | 2518.6439 |
| 2532.1794 | 2572.5625 | 2585.6004 |
| 2588.2374 | 2694.9928 | 2696.4978 |
| 3056.5002 | 3060.3257 | 3145.9811 |
| 3151.5783 | 3159.0766 | 3161.1626 |

### **B<sub>3</sub>H<sub>10</sub><sup>-</sup>**

Zero-point correction = 0.100877

Thermal correction to Energy = 0.107949

Thermal correction to Enthalpy = 0.108893

Thermal correction to Gibbs Free Energy = 0.071816

Sum of electronic and zero-point Energies = -80.461533

Sum of electronic and thermal Energies = -80.454462

Sum of electronic and thermal Enthalpies = -80.453517

Sum of electronic and thermal Free Energies = -80.490595

Cartesian coordinates

|   |           |           |           |
|---|-----------|-----------|-----------|
| B | -1.999059 | -0.328655 | -0.005211 |
| H | -2.168436 | -0.540404 | -1.176870 |
| H | -2.204522 | -1.281452 | 0.709578  |
| H | -2.469120 | 0.696660  | 0.408092  |
| B | -0.017235 | 0.687595  | 0.003226  |
| H | -0.375431 | 1.429862  | -0.859549 |
| H | -0.688642 | -0.386061 | 0.201905  |
| H | 0.230991  | 1.153038  | 1.068709  |
| B | 2.010289  | -0.326316 | 0.008615  |
| H | 2.378717  | -0.982171 | -0.938451 |
| H | 1.733708  | -0.980255 | 0.976447  |
| H | 2.676308  | 0.654054  | 0.214860  |
| H | 0.916449  | 0.073611  | -0.637869 |

### Vibrational frequencies

|           |           |           |
|-----------|-----------|-----------|
| 84.0585   | 89.5769   | 199.7582  |
| 249.1660  | 270.8760  | 319.1510  |
| 516.4511  | 644.2260  | 772.6824  |
| 814.6184  | 903.1266  | 963.2127  |
| 1023.0316 | 1036.1624 | 1106.7772 |
| 1109.8883 | 1170.0165 | 1179.2299 |
| 1183.9846 | 1194.9296 | 1203.6651 |
| 1602.7749 | 1658.8760 | 2152.8442 |
| 2258.9802 | 2499.2879 | 2503.9085 |
| 2553.5696 | 2556.2833 | 2586.1943 |
| 2591.1966 | 2602.7351 | 2678.8606 |

### TSVII

Zero-point correction = 0.098994

Thermal correction to Energy = 0.105660

Thermal correction to Enthalpy = 0.106604

Thermal correction to Gibbs Free Energy = 0.069666

Sum of electronic and zero-point Energies = -80.447707

Sum of electronic and thermal Energies = -80.441041

Sum of electronic and thermal Enthalpies = -80.440096

Sum of electronic and thermal Free Energies = -80.477034

### Cartesian coordinates

|   |           |           |           |
|---|-----------|-----------|-----------|
| B | -2.063770 | -0.262728 | -0.000254 |
| H | -1.913798 | -0.938546 | -1.002334 |
| H | -1.911114 | -0.920188 | 1.013394  |
| H | -3.122714 | 0.339136  | -0.004193 |
| B | 1.701698  | -0.552929 | -0.000043 |
| H | 2.063924  | 0.628342  | 0.005304  |
| H | 1.978059  | -1.086033 | 1.031959  |
| H | 1.987739  | -1.079452 | -1.032818 |
| H | -1.168807 | 0.614697  | -0.010513 |
| B | 0.522329  | 0.842387  | 0.000402  |
| H | 0.415610  | -0.482383 | -0.006329 |
| H | 0.439228  | 1.400167  | -1.043468 |
| H | 0.430592  | 1.390610  | 1.048478  |

### Vibrational frequencies

|           |           |           |
|-----------|-----------|-----------|
| -428.5970 | 37.4719   | 120.7041  |
| 144.3261  | 322.6114  | 410.4389  |
| 441.0680  | 528.3307  | 813.1218  |
| 843.9350  | 941.0980  | 955.1283  |
| 982.6280  | 1078.8632 | 1079.9591 |
| 1118.1616 | 1133.6719 | 1143.3499 |



|           |           |           |
|-----------|-----------|-----------|
| 1174.8565 | 1193.3229 | 1215.0582 |
| 1301.9875 | 1817.5202 | 2139.3876 |
| 2202.5288 | 2394.8874 | 2415.5673 |
| 2441.8366 | 2445.7580 | 2580.4119 |
| 2646.1197 | 2647.5044 | 2741.5654 |

### **BH<sub>4</sub><sup>-</sup> + B<sub>2</sub>H<sub>6</sub>**

Zero-point correction = 0.100114

Thermal correction to Energy = 0.107605

Thermal correction to Enthalpy = 0.108550

Thermal correction to Gibbs Free Energy = 0.069238

Sum of electronic and zero-point Energies = -80.452952

Sum of electronic and thermal Energies = -80.445461

Sum of electronic and thermal Enthalpies = -80.444517

Sum of electronic and thermal Free Energies = -80.483828

Cartesian coordinates

|   |           |           |           |
|---|-----------|-----------|-----------|
| B | -1.264622 | 0.874800  | -0.000254 |
| H | -1.269175 | 1.453761  | 1.035758  |
| H | -1.256720 | 1.453783  | -1.036167 |
| B | -1.308969 | -0.862461 | -0.000230 |
| H | -1.327561 | -1.441860 | -1.035869 |
| H | -0.303275 | -0.019121 | 0.005496  |
| H | -2.276594 | 0.029719  | -0.006184 |
| H | -1.339985 | -1.441330 | 1.035456  |
| B | 2.296996  | -0.011812 | 0.000427  |
| H | 1.867898  | -0.581664 | 1.000946  |
| H | 1.869465  | -0.577364 | -1.003195 |
| H | 1.896040  | 1.151921  | 0.002568  |
| H | 3.522887  | -0.030480 | 0.001471  |

Vibrational frequencies

|           |           |           |
|-----------|-----------|-----------|
| 27.9383   | 69.7967   | 181.2808  |
| 182.0792  | 249.0170  | 250.9637  |
| 375.0659  | 835.7208  | 846.6799  |
| 864.8433  | 931.1921  | 962.7164  |
| 979.9143  | 1049.8177 | 1098.7136 |
| 1099.4178 | 1140.0173 | 1188.0877 |
| 1206.7641 | 1235.7456 | 1240.5400 |
| 1675.2478 | 1868.4775 | 2046.1537 |
| 2178.3733 | 2328.7635 | 2363.3530 |
| 2364.9701 | 2366.3696 | 2632.6233 |
| 2653.9540 | 2718.6970 | 2731.5331 |

### **TSVIII**

Zero-point correction = 0.097292  
 Thermal correction to Energy = 0.103791  
 Thermal correction to Enthalpy = 0.104735  
 Thermal correction to Gibbs Free Energy = 0.069422  
 Sum of electronic and zero-point Energies = -80.405208  
 Sum of electronic and thermal Energies = -80.398709  
 Sum of electronic and thermal Enthalpies = -80.397765  
 Sum of electronic and thermal Free Energies = -80.433078

Cartesian coordinates

|   |           |           |           |
|---|-----------|-----------|-----------|
| B | -0.248980 | 0.779853  | -0.177486 |
| H | 1.397609  | -1.283166 | -0.727061 |
| H | -0.588761 | 1.650501  | -0.920281 |
| H | -0.073656 | 1.582139  | 0.877752  |
| B | 1.652264  | -0.376408 | 0.012704  |
| H | 2.704585  | 0.174923  | -0.219444 |
| H | 0.996304  | 0.727576  | -0.389216 |
| H | 1.461752  | -0.577397 | 1.179985  |
| B | -1.440633 | -0.534176 | -0.005919 |
| H | -0.557758 | 0.840383  | 1.054922  |
| H | -2.545640 | -0.028318 | 0.142230  |
| H | -1.398551 | -1.136268 | -1.064039 |
| H | -1.209137 | -1.296713 | 0.918656  |

Vibrational frequencies

|           |           |           |
|-----------|-----------|-----------|
| -554.2799 | 105.6057  | 180.5064  |
| 212.0587  | 282.2164  | 316.3935  |
| 495.1987  | 651.5126  | 676.1198  |
| 788.0313  | 805.3937  | 863.0646  |
| 933.6084  | 985.3080  | 1018.0080 |
| 1089.0522 | 1113.0083 | 1168.2373 |
| 1176.8962 | 1184.8808 | 1188.2681 |
| 1252.0699 | 1635.8473 | 2214.2705 |
| 2285.2068 | 2357.5219 | 2403.5289 |
| 2425.5718 | 2484.6631 | 2563.1724 |
| 2589.5119 | 2605.0517 | 2656.4846 |

**[B<sub>2</sub>H<sub>4</sub>(μ-H)BH<sub>3</sub>]<sup>-</sup> + H<sub>2</sub>**

Zero-point correction = 0.098480  
 Thermal correction to Energy = 0.105331  
 Thermal correction to Enthalpy = 0.106276  
 Thermal correction to Gibbs Free Energy = 0.070415  
 Sum of electronic and zero-point Energies = -80.407247  
 Sum of electronic and thermal Energies = -80.400395  
 Sum of electronic and thermal Enthalpies = -80.399451

Sum of electronic and thermal Free Energies = -80.435311

Cartesian coordinates

|   |           |           |           |
|---|-----------|-----------|-----------|
| B | 0.202649  | 0.431646  | 0.200794  |
| H | -2.164042 | -1.096220 | -0.861482 |
| H | -0.031064 | 1.058415  | 1.182527  |
| H | -0.193876 | 1.452817  | -0.638025 |
| B | -1.902254 | -0.265084 | -0.023466 |
| H | -2.084666 | -0.631077 | 1.105606  |
| H | -0.579963 | -0.450184 | -0.259460 |
| H | -2.332237 | 0.826182  | -0.284153 |
| B | 1.780928  | -0.319480 | -0.023049 |
| H | 0.547246  | 1.116547  | -0.877528 |
| H | 2.669524  | 0.491083  | 0.213669  |
| H | 1.825689  | -1.224187 | 0.795543  |
| H | 1.936776  | -0.778789 | -1.148092 |

Vibrational frequencies

|           |           |           |
|-----------|-----------|-----------|
| 114.9375  | 185.7191  | 204.0525  |
| 266.7186  | 300.9342  | 357.1029  |
| 521.4821  | 651.9470  | 709.4120  |
| 769.9879  | 825.9542  | 845.4349  |
| 884.1508  | 1025.1070 | 1058.7532 |
| 1083.4217 | 1114.7736 | 1174.6881 |
| 1178.5407 | 1183.5140 | 1186.2908 |
| 1219.6015 | 1581.5441 | 2062.2588 |
| 2209.5723 | 2350.8950 | 2367.8560 |
| 2394.9382 | 2503.5138 | 2556.0993 |
| 2581.8533 | 2674.6892 | 3081.8441 |

## TSIX

Zero-point correction = 0.095891

Thermal correction to Energy = 0.102621

Thermal correction to Enthalpy = 0.103566

Thermal correction to Gibbs Free Energy = 0.068011

Sum of electronic and zero-point Energies = -80.406747

Sum of electronic and thermal Energies = -80.400017

Sum of electronic and thermal Enthalpies = -80.399072

Sum of electronic and thermal Free Energies = -80.434627

Cartesian coordinates

|   |           |           |           |
|---|-----------|-----------|-----------|
| B | -0.223280 | 0.354025  | -0.280959 |
| H | 2.192928  | -0.891384 | 1.051597  |
| H | 0.133850  | 0.873681  | -1.289208 |
| H | 0.118405  | 1.910730  | 0.450289  |
| B | 1.857880  | -0.299285 | 0.053452  |

|   |           |           |           |
|---|-----------|-----------|-----------|
| H | 1.765721  | -1.000274 | -0.919306 |
| H | 0.635695  | -0.110906 | 0.550908  |
| H | 2.420267  | 0.750060  | -0.114231 |
| B | -1.733067 | -0.349244 | 0.067679  |
| H | -0.532638 | 1.624183  | 0.744177  |
| H | -2.655189 | 0.305443  | -0.401380 |
| H | -1.665775 | -1.421159 | -0.530194 |
| H | -1.920930 | -0.567850 | 1.256485  |

Vibrational frequencies

|           |           |           |
|-----------|-----------|-----------|
| -469.0900 | 115.1111  | 216.4443  |
| 239.4389  | 295.6292  | 300.5662  |
| 354.6624  | 587.6636  | 627.4039  |
| 662.0718  | 735.4231  | 762.1756  |
| 847.5326  | 979.7426  | 999.9265  |
| 1034.7246 | 1079.9458 | 1099.6692 |
| 1153.7894 | 1163.7845 | 1170.8544 |
| 1184.8429 | 1194.7606 | 1681.0856 |
| 2142.4486 | 2348.5915 | 2384.8301 |
| 2390.7741 | 2501.3350 | 2554.9644 |
| 2581.4032 | 2685.1693 | 4014.5981 |

**B<sub>3</sub>H<sub>8</sub><sup>-</sup>(I)**

Zero-point correction = 0.082064

Thermal correction to Energy = 0.087421

Thermal correction to Enthalpy = 0.088365

Thermal correction to Gibbs Free Energy = 0.055706

Sum of electronic and zero-point Energies = -79.283768

Sum of electronic and thermal Energies = -79.278412

Sum of electronic and thermal Enthalpies = -79.277468

Sum of electronic and thermal Free Energies = -79.310127

Cartesian coordinates

|   |           |           |           |
|---|-----------|-----------|-----------|
| B | 1.558226  | -0.218183 | -0.000054 |
| H | 2.188834  | 0.149922  | 0.989902  |
| H | 2.189176  | 0.149025  | -0.990133 |
| B | 0.038397  | 0.546833  | -0.000083 |
| H | -0.803733 | 0.066097  | -0.969834 |
| B | -1.569096 | -0.261804 | -0.000001 |
| H | -1.658102 | -1.453293 | -0.000287 |
| H | -2.567126 | 0.397871  | 0.000277  |
| H | -0.803322 | 0.065465  | 0.969752  |
| H | 1.472760  | -1.443138 | 0.000738  |
| H | -0.156119 | 1.733821  | 0.000270  |

Vibrational frequencies

|           |           |           |
|-----------|-----------|-----------|
| 166.7366  | 195.1495  | 336.2038  |
| 473.4417  | 594.7861  | 707.9866  |
| 797.0421  | 847.8346  | 859.5741  |
| 943.6669  | 944.7575  | 1048.1913 |
| 1052.4624 | 1106.8074 | 1159.2426 |
| 1162.1523 | 1185.5388 | 1633.7797 |
| 1687.8449 | 2115.4930 | 2215.9530 |
| 2324.3408 | 2332.0494 | 2343.7580 |
| 2553.3745 | 2586.5200 | 2647.3317 |

## TSX

Zero-point correction = 0.080265

Thermal correction to Energy = 0.085225

Thermal correction to Enthalpy = 0.086170

Thermal correction to Gibbs Free Energy = 0.054361

Sum of electronic and zero-point Energies = -79.272268

Sum of electronic and thermal Energies = -79.267308

Sum of electronic and thermal Enthalpies = -79.266364

Sum of electronic and thermal Free Energies = -79.298172

Cartesian coordinates

|   |           |           |           |
|---|-----------|-----------|-----------|
| B | -0.172912 | -0.529464 | -0.041349 |
| H | 0.692123  | 0.025232  | 0.831478  |
| H | -0.034538 | -1.718997 | -0.036970 |
| B | -1.571495 | 0.282896  | -0.068334 |
| H | -1.616251 | 1.478218  | 0.098780  |
| H | -2.582966 | -0.260213 | -0.443975 |
| H | -1.265746 | -0.269502 | 1.072917  |
| H | 2.533250  | -0.397642 | 0.404669  |
| B | 1.609539  | 0.233759  | -0.040536 |
| H | 1.723269  | 1.428593  | -0.073958 |
| H | 1.225197  | -0.221640 | -1.101846 |

Vibrational frequencies

|           |           |           |
|-----------|-----------|-----------|
| -501.6197 | 195.7485  | 377.8858  |
| 447.8666  | 460.2991  | 512.6480  |
| 715.6272  | 798.5181  | 882.8767  |
| 937.7774  | 964.7945  | 1026.0610 |
| 1088.2989 | 1105.4691 | 1135.7048 |
| 1164.0915 | 1184.0883 | 1215.4776 |
| 1778.5562 | 1931.9804 | 2109.4123 |
| 2473.6892 | 2483.7740 | 2522.1228 |
| 2534.6978 | 2581.4530 | 2603.2705 |

## B<sub>3</sub>H<sub>8</sub><sup>-</sup>(II)

Zero-point correction = 0.081271  
 Thermal correction to Energy = 0.086818  
 Thermal correction to Enthalpy = 0.087762  
 Thermal correction to Gibbs Free Energy = 0.054670  
 Sum of electronic and zero-point Energies = -79.273421  
 Sum of electronic and thermal Energies = -79.267874  
 Sum of electronic and thermal Enthalpies = -79.266930  
 Sum of electronic and thermal Free Energies = -79.300021

Cartesian coordinates

|   |           |           |           |
|---|-----------|-----------|-----------|
| B | -0.285181 | -0.611686 | -0.001464 |
| H | 0.705836  | -0.216867 | 0.731496  |
| H | -0.204777 | -1.792257 | -0.172572 |
| B | -1.554626 | 0.357886  | -0.098616 |
| H | -1.501119 | 1.516579  | 0.221721  |
| H | -2.635671 | -0.075810 | -0.409294 |
| H | -1.167065 | -0.383332 | 1.010817  |
| H | 2.553595  | -0.256733 | 0.577825  |
| B | 1.655050  | 0.242526  | -0.062311 |
| H | 1.566117  | 1.437820  | 0.041463  |
| H | 1.606870  | -0.173029 | -1.189497 |

Vibrational frequencies

|           |           |           |
|-----------|-----------|-----------|
| 144.4406  | 239.6032  | 291.3045  |
| 423.1175  | 449.7434  | 706.4478  |
| 779.6560  | 798.8013  | 861.4335  |
| 915.5735  | 983.8874  | 1042.8796 |
| 1064.6643 | 1102.8819 | 1180.2460 |
| 1199.1951 | 1206.3242 | 1288.2621 |
| 1720.9070 | 1829.7765 | 2120.3602 |
| 2486.9472 | 2522.8701 | 2544.8056 |
| 2572.1098 | 2577.9305 | 2619.6241 |

## TSXI

Zero-point correction = 0.080673  
 Thermal correction to Energy = 0.085669  
 Thermal correction to Enthalpy = 0.086613  
 Thermal correction to Gibbs Free Energy = 0.054641  
 Sum of electronic and zero-point Energies = -79.259249  
 Sum of electronic and thermal Energies = -79.254253  
 Sum of electronic and thermal Enthalpies = -79.253309  
 Sum of electronic and thermal Free Energies = -79.285281

Cartesian coordinates

|   |           |          |          |
|---|-----------|----------|----------|
| B | 0.296011  | 0.796327 | 0.040367 |
| H | -0.629925 | 0.854152 | 0.825734 |

|   |           |           |           |
|---|-----------|-----------|-----------|
| H | 0.484260  | 1.805952  | -0.574055 |
| B | 1.272337  | -0.498073 | -0.056961 |
| H | 1.113929  | -1.480772 | 0.613387  |
| H | 2.264093  | -0.465605 | -0.737254 |
| H | 1.280732  | 0.561779  | 0.863415  |
| H | -2.080619 | -0.362519 | 0.938693  |
| B | -1.437828 | -0.297971 | -0.083942 |
| H | -1.180131 | -1.380580 | -0.535740 |
| H | -1.904942 | 0.466180  | -0.891499 |

Vibrational frequencies

|           |           |           |
|-----------|-----------|-----------|
| -573.0641 | 175.8419  | 344.1600  |
| 390.2481  | 452.3914  | 633.8264  |
| 814.8191  | 821.7620  | 882.6058  |
| 917.8581  | 946.6616  | 984.7795  |
| 1058.7962 | 1103.8674 | 1146.9382 |
| 1190.6576 | 1208.4458 | 1231.6120 |
| 1332.1936 | 1993.6655 | 2471.7752 |
| 2497.8214 | 2526.4748 | 2543.3995 |
| 2558.5777 | 2585.3225 | 2596.7989 |

**3.2. Solvent: THF.**

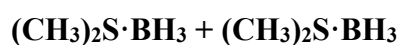

Zero-point correction = 0.217416

Thermal correction to Energy = 0.232973

Thermal correction to Enthalpy = 0.233917

Thermal correction to Gibbs Free Energy = 0.173771

Sum of electronic and zero-point Energies = -1009.029542

Sum of electronic and thermal Energies = -1009.013985

Sum of electronic and thermal Enthalpies = -1009.013041

Sum of electronic and thermal Free Energies = -1009.073187

Cartesian coordinates

|   |          |           |           |
|---|----------|-----------|-----------|
| S | 1.918575 | -0.065383 | -0.197245 |
| C | 3.567818 | -0.606527 | -0.695701 |
| H | 4.260736 | -0.476031 | 0.135823  |
| H | 3.498789 | -1.660566 | -0.960906 |
| H | 3.887316 | -0.030544 | -1.564535 |
| C | 2.303558 | 1.597202  | 0.391367  |
| H | 2.620007 | 2.211747  | -0.451307 |
| H | 1.389503 | 2.003944  | 0.822398  |
| H | 3.085952 | 1.536625  | 1.148986  |
| B | 1.638640 | -1.068589 | 1.465413  |
| H | 1.488993 | -2.206294 | 1.092325  |

|   |           |           |           |
|---|-----------|-----------|-----------|
| H | 2.637555  | -0.885155 | 2.116363  |
| H | 0.642410  | -0.582653 | 1.939282  |
| S | -2.675626 | 0.105525  | -0.562140 |
| C | -3.329833 | -0.211522 | 1.090941  |
| H | -2.498879 | -0.295451 | 1.792104  |
| H | -3.962466 | 0.634131  | 1.358833  |
| H | -3.922734 | -1.125701 | 1.075676  |
| C | -1.564025 | -1.307961 | -0.724306 |
| H | -2.154092 | -2.223599 | -0.759925 |
| H | -1.016769 | -1.187701 | -1.658914 |
| H | -0.875933 | -1.322723 | 0.121913  |
| B | -1.446566 | 1.599959  | -0.237707 |
| H | -2.181098 | 2.529567  | -0.012660 |
| H | -0.785950 | 1.247362  | 0.708020  |
| H | -0.826005 | 1.706759  | -1.265660 |

Vibrational frequencies

|           |           |           |
|-----------|-----------|-----------|
| 19.8857   | 54.2736   | 60.5741   |
| 75.9533   | 82.7250   | 99.6459   |
| 132.7975  | 178.2963  | 185.7513  |
| 196.4215  | 213.1132  | 224.4554  |
| 232.0837  | 238.2650  | 252.0029  |
| 257.8595  | 294.4650  | 298.7655  |
| 515.8542  | 517.5552  | 720.8408  |
| 722.0407  | 759.2548  | 760.5834  |
| 808.8838  | 812.3483  | 818.5573  |
| 829.0883  | 944.3420  | 957.9595  |
| 1002.3186 | 1007.7987 | 1026.6160 |
| 1028.1035 | 1063.1556 | 1073.9831 |
| 1107.9016 | 1114.4490 | 1173.3969 |
| 1175.6214 | 1178.7221 | 1188.9870 |
| 1355.2625 | 1359.1993 | 1378.2861 |
| 1386.4693 | 1446.7299 | 1449.4107 |
| 1452.2086 | 1454.0901 | 1457.8094 |
| 1461.0688 | 1463.4344 | 1467.8631 |
| 2488.8118 | 2494.9665 | 2544.2061 |
| 2548.1104 | 2552.8491 | 2561.3908 |
| 3067.3025 | 3068.7370 | 3071.7684 |
| 3073.8704 | 3169.7290 | 3171.0097 |
| 3173.2190 | 3175.3802 | 3176.7784 |
| 3182.8203 | 3187.1481 | 3188.9691 |

**TSI**

Zero-point correction = 0.216186



Thermal correction to Energy = 0.231404  
 Thermal correction to Enthalpy = 0.232348  
 Thermal correction to Gibbs Free Energy = 0.172519  
 Sum of electronic and zero-point Energies = -1009.002495  
 Sum of electronic and thermal Energies = -1008.987277  
 Sum of electronic and thermal Enthalpies = -1008.986333  
 Sum of electronic and thermal Free Energies = -1009.046162

Cartesian coordinates

|   |           |           |           |
|---|-----------|-----------|-----------|
| S | 2.627410  | 0.008809  | -0.485024 |
| C | 4.294565  | 0.157557  | 0.194969  |
| H | 4.248188  | 0.120632  | 1.283597  |
| H | 4.875264  | -0.682635 | -0.183861 |
| H | 4.734809  | 1.094359  | -0.144587 |
| C | 1.830041  | 1.386284  | 0.371067  |
| H | 2.362974  | 2.302539  | 0.117690  |
| H | 0.803084  | 1.447243  | 0.015073  |
| H | 1.850704  | 1.204174  | 1.445609  |
| B | 2.004352  | -1.596574 | 0.448165  |
| H | 2.799913  | -2.436301 | 0.117243  |
| H | 1.983276  | -1.323528 | 1.617788  |
| H | 0.908840  | -1.860394 | -0.023993 |
| S | -3.090305 | 0.070207  | -0.631842 |
| C | -2.738900 | 1.566829  | 0.322727  |
| H | -2.083902 | 1.329946  | 1.163198  |
| H | -2.235547 | 2.271740  | -0.340028 |
| H | -3.663421 | 2.018618  | 0.684697  |
| C | -3.794583 | -0.945699 | 0.690134  |
| H | -4.704926 | -0.490729 | 1.082506  |
| H | -4.036679 | -1.919580 | 0.263954  |
| H | -3.064070 | -1.078605 | 1.490446  |
| B | -0.604259 | -1.039221 | -0.301019 |
| H | -0.175060 | -0.438380 | -1.239522 |
| H | -0.656786 | -0.515823 | 0.769716  |
| H | -1.087552 | -2.118376 | -0.458784 |

Vibrational frequencies

|           |          |          |
|-----------|----------|----------|
| -322.8782 | 21.7675  | 35.7648  |
| 49.2174   | 70.6128  | 98.0695  |
| 123.6560  | 167.0979 | 185.3317 |
| 188.9149  | 208.6765 | 214.0199 |
| 228.5148  | 241.9635 | 251.2376 |
| 258.6488  | 277.8772 | 285.0454 |
| 307.4073  | 526.2098 | 710.3255 |
| 717.4756  | 720.3919 | 757.5070 |

|           |           |           |
|-----------|-----------|-----------|
| 769.6594  | 801.3594  | 817.1625  |
| 857.4475  | 934.6498  | 953.8915  |
| 969.7013  | 991.9145  | 1000.4355 |
| 1020.0975 | 1040.4846 | 1066.4665 |
| 1068.4527 | 1102.7670 | 1144.4864 |
| 1161.2919 | 1167.7420 | 1197.2544 |
| 1350.9170 | 1352.1501 | 1375.3105 |
| 1375.7712 | 1443.9688 | 1449.8104 |
| 1454.7381 | 1458.7989 | 1461.2287 |
| 1465.3238 | 1470.7979 | 1477.0735 |
| 2384.3865 | 2537.9362 | 2579.0943 |
| 2594.6923 | 2680.3615 | 2692.6969 |
| 3053.9559 | 3057.9880 | 3068.2580 |
| 3074.1730 | 3145.7072 | 3151.7199 |
| 3154.8792 | 3157.1393 | 3171.1070 |
| 3175.9348 | 3179.3086 | 3188.5302 |

### (CH<sub>3</sub>)<sub>2</sub>S

Zero-point correction = 0.076173

Thermal correction to Energy = 0.081046

Thermal correction to Enthalpy = 0.081990

Thermal correction to Gibbs Free Energy = 0.049115

Sum of electronic and zero-point Energies = -477.907129

Sum of electronic and thermal Energies = -477.902256

Sum of electronic and thermal Enthalpies = -477.901312

Sum of electronic and thermal Free Energies = -477.934187

Cartesian coordinates

|   |           |           |           |
|---|-----------|-----------|-----------|
| S | 0.000002  | 0.663616  | -0.000067 |
| C | 1.375005  | -0.514830 | 0.000168  |
| H | 1.355387  | -1.141236 | -0.893311 |
| H | 2.300422  | 0.062263  | 0.000134  |
| H | 1.355296  | -1.140989 | 0.893818  |
| C | -1.375007 | -0.514827 | -0.000064 |
| H | -1.355327 | -1.141137 | 0.893479  |
| H | -2.300422 | 0.062269  | -0.000026 |
| H | -1.355372 | -1.141082 | -0.893648 |

Vibrational frequencies

|           |           |           |
|-----------|-----------|-----------|
| 160.6987  | 191.4375  | 272.9580  |
| 720.2820  | 770.3654  | 945.3411  |
| 959.7087  | 991.7952  | 1070.5156 |
| 1362.4267 | 1385.3094 | 1456.6870 |
| 1462.1332 | 1463.9013 | 1472.5420 |
| 3062.7049 | 3066.0241 | 3149.2290 |

3155.4779

3157.5714

3159.0236

**(CH<sub>3</sub>)<sub>2</sub>BH<sub>2</sub>(μ-H)BH<sub>3</sub>**

Zero-point correction = 0.141088

Thermal correction to Energy = 0.150151

Thermal correction to Enthalpy = 0.151095

Thermal correction to Gibbs Free Energy = 0.108078

Sum of electronic and zero-point Energies = -531.097375

Sum of electronic and thermal Energies = -531.088312

Sum of electronic and thermal Enthalpies = -531.087368

Sum of electronic and thermal Free Energies = -531.130385

Cartesian coordinates

|   |           |           |           |
|---|-----------|-----------|-----------|
| S | 0.535915  | -0.003545 | -0.551475 |
| C | 1.941300  | -0.752822 | 0.303202  |
| H | 1.755027  | -0.751559 | 1.377014  |
| H | 2.038982  | -1.773454 | -0.064202 |
| H | 2.838124  | -0.184406 | 0.060234  |
| C | 0.486687  | 1.602522  | 0.276034  |
| H | 1.445362  | 2.094983  | 0.114426  |
| H | -0.309237 | 2.187753  | -0.180374 |
| H | 0.292931  | 1.459114  | 1.338954  |
| B | -0.907834 | -1.035931 | 0.267633  |
| H | -0.688794 | -2.165277 | -0.064936 |
| H | -0.912461 | -0.805387 | 1.433356  |
| H | -1.889401 | -0.775045 | -0.488124 |
| B | -2.813989 | 0.047669  | 0.044628  |
| H | -3.322616 | 0.165039  | -1.041712 |
| H | -2.339357 | 1.058739  | 0.476683  |
| H | -3.442010 | -0.610674 | 0.825550  |

Vibrational frequencies

|           |           |           |
|-----------|-----------|-----------|
| 51.4727   | 109.1965  | 152.3098  |
| 193.4013  | 232.2240  | 250.5289  |
| 260.8532  | 296.1059  | 323.2418  |
| 498.2444  | 579.0088  | 668.2377  |
| 715.0912  | 766.3256  | 798.8293  |
| 888.3333  | 959.8861  | 976.5808  |
| 1006.3841 | 1031.3574 | 1052.5283 |
| 1079.3017 | 1108.4108 | 1162.9719 |
| 1177.8581 | 1194.1396 | 1358.7755 |
| 1385.4211 | 1451.6116 | 1457.1739 |
| 1461.0910 | 1469.2732 | 1670.2879 |
| 2232.3547 | 2524.9338 | 2584.9681 |
| 2595.0582 | 2615.8579 | 2683.6264 |

|           |           |           |
|-----------|-----------|-----------|
| 3077.2565 | 3080.1930 | 3182.3306 |
| 3184.8493 | 3191.1747 | 3191.4115 |

## TSII

Zero-point correction = 0.140598

Thermal correction to Energy = 0.149220

Thermal correction to Enthalpy = 0.150164

Thermal correction to Gibbs Free Energy = 0.108045

Sum of electronic and zero-point Energies = -531.088492

Sum of electronic and thermal Energies = -531.079870

Sum of electronic and thermal Enthalpies = -531.078926

Sum of electronic and thermal Free Energies = -531.121045

Cartesian coordinates

|   |           |           |           |
|---|-----------|-----------|-----------|
| S | 0.684293  | 0.034312  | -0.614917 |
| C | 1.707619  | -1.117022 | 0.327349  |
| H | 1.357054  | -1.157960 | 1.359991  |
| H | 1.608033  | -2.099954 | -0.132776 |
| H | 2.750313  | -0.802649 | 0.290778  |
| C | 0.945295  | 1.538365  | 0.351981  |
| H | 1.973090  | 1.882482  | 0.239905  |
| H | 0.265547  | 2.299648  | -0.031758 |
| H | 0.719712  | 1.342179  | 1.401197  |
| B | -1.348164 | -0.681391 | 0.332568  |
| H | -1.266838 | -1.766311 | -0.142127 |
| H | -0.963469 | -0.409942 | 1.423711  |
| H | -1.785099 | 0.295767  | -0.438658 |
| B | -3.000399 | 0.119030  | -0.027013 |
| H | -3.587149 | -0.189178 | -1.020084 |
| H | -3.264157 | 1.149946  | 0.516016  |
| H | -2.930396 | -0.809271 | 0.768714  |

Vibrational frequencies

|           |           |           |
|-----------|-----------|-----------|
| -381.5994 | 62.9639   | 123.4338  |
| 178.3287  | 219.0977  | 232.6561  |
| 240.6038  | 281.5020  | 319.8917  |
| 386.9023  | 438.6160  | 718.9208  |
| 771.5563  | 796.0211  | 848.6284  |
| 938.5212  | 948.6567  | 981.3167  |
| 1005.7657 | 1019.0421 | 1038.0051 |
| 1071.5994 | 1112.2372 | 1147.8581 |
| 1174.1670 | 1237.5041 | 1354.9576 |
| 1380.6043 | 1452.7641 | 1460.1706 |
| 1467.6190 | 1472.3502 | 1841.5973 |
| 2110.7593 | 2451.4180 | 2584.6661 |

|           |           |           |
|-----------|-----------|-----------|
| 2638.3529 | 2648.0375 | 2736.9152 |
| 3066.9299 | 3070.3399 | 3163.4289 |
| 3167.2585 | 3172.7955 | 3180.4760 |

### **B<sub>2</sub>H<sub>6</sub>**

Zero-point correction = 0.063142

Thermal correction to Energy = 0.066750

Thermal correction to Enthalpy = 0.067694

Thermal correction to Gibbs Free Energy = 0.040013

Sum of electronic and zero-point Energies = -53.189578

Sum of electronic and thermal Energies = -53.185970

Sum of electronic and thermal Enthalpies = -53.185026

Sum of electronic and thermal Free Energies = -53.212707

Cartesian coordinates

|   |           |           |           |
|---|-----------|-----------|-----------|
| B | -0.874206 | 0.000054  | -0.000004 |
| H | -1.450932 | 1.035967  | 0.000105  |
| H | -1.450852 | -1.035932 | -0.000095 |
| B | 0.874195  | 0.000056  | 0.000001  |
| H | 1.450915  | -1.035888 | -0.000135 |
| H | 0.000009  | -0.000179 | -0.980067 |
| H | 0.000028  | -0.000509 | 0.980141  |
| H | 1.450886  | 1.035994  | 0.000067  |

Vibrational frequencies

|           |           |           |
|-----------|-----------|-----------|
| 334.8457  | 818.8099  | 856.3643  |
| 890.0867  | 916.4785  | 954.3785  |
| 987.2047  | 1050.2024 | 1174.2816 |
| 1195.0240 | 1678.7295 | 1872.2070 |
| 2037.1136 | 2184.8761 | 2639.3777 |
| 2659.9181 | 2727.8909 | 2738.4438 |

### **B<sub>2</sub>H<sub>6</sub> + DMS**

Zero-point correction = 0.141099

Thermal correction to Energy = 0.150853

Thermal correction to Enthalpy = 0.151797

Thermal correction to Gibbs Free Energy = 0.106187

Sum of electronic and zero-point Energies = -531.099401

Sum of electronic and thermal Energies = -531.089647

Sum of electronic and thermal Enthalpies = -531.088703

Sum of electronic and thermal Free Energies = -531.134313

Cartesian coordinates

|   |           |          |          |
|---|-----------|----------|----------|
| B | -2.529425 | 0.671091 | 0.521863 |
| H | -2.942290 | 1.719018 | 0.150008 |

|   |           |           |           |
|---|-----------|-----------|-----------|
| H | -2.250458 | 0.482259  | 1.660365  |
| B | -2.312237 | -0.628268 | -0.622780 |
| H | -1.898861 | -1.666778 | -0.226999 |
| H | -3.346032 | -0.269266 | 0.120469  |
| H | -1.509462 | 0.336351  | -0.230253 |
| H | -2.590180 | -0.453807 | -1.761856 |
| S | 1.216765  | -0.184120 | -0.616641 |
| C | 0.948639  | -1.197954 | 0.860371  |
| H | 0.018709  | -0.916046 | 1.358386  |
| H | 0.881648  | -2.239137 | 0.543361  |
| H | 1.783292  | -1.092165 | 1.555061  |
| C | 1.211003  | 1.444860  | 0.176894  |
| H | 2.033888  | 1.528104  | 0.888278  |
| H | 1.338036  | 2.197373  | -0.602093 |
| H | 0.263931  | 1.624465  | 0.692524  |

Vibrational frequencies

|           |           |           |
|-----------|-----------|-----------|
| 62.6083   | 63.3477   | 103.8353  |
| 124.1524  | 158.5065  | 180.6552  |
| 186.9408  | 218.0319  | 277.6592  |
| 378.0612  | 725.5716  | 779.3101  |
| 823.7690  | 861.4724  | 880.9932  |
| 922.3295  | 928.6682  | 965.4857  |
| 970.8924  | 987.5118  | 1004.1964 |
| 1058.0137 | 1064.1373 | 1174.4403 |
| 1197.5648 | 1352.4780 | 1379.9768 |
| 1451.9987 | 1457.8410 | 1470.4046 |
| 1479.0964 | 1669.4462 | 1860.6487 |
| 2038.8431 | 2180.1950 | 2645.7322 |
| 2669.7152 | 2735.1709 | 2753.6307 |
| 3047.1962 | 3054.5905 | 3130.3231 |
| 3137.5499 | 3155.8303 | 3166.3217 |

**BH<sub>4</sub><sup>-</sup> + B<sub>2</sub>H<sub>6</sub>**

Zero-point correction = 0.099961

Thermal correction to Energy = 0.107428

Thermal correction to Enthalpy = 0.108372

Thermal correction to Gibbs Free Energy = 0.069895

Sum of electronic and zero-point Energies = -80.482605

Sum of electronic and thermal Energies = -80.475139

Sum of electronic and thermal Enthalpies = -80.474194

Sum of electronic and thermal Free Energies = -80.512672

Cartesian coordinates

|   |          |          |          |
|---|----------|----------|----------|
| B | 1.264622 | 0.874800 | 0.001899 |
|---|----------|----------|----------|

|   |           |           |           |
|---|-----------|-----------|-----------|
| H | 1.313431  | 1.453372  | -1.034182 |
| H | 1.211465  | 1.454172  | 1.037433  |
| B | 1.308971  | -0.862461 | 0.001667  |
| H | 1.283311  | -1.444472 | 1.036449  |
| H | 0.303410  | -0.019137 | -0.042536 |
| H | 2.276444  | 0.029737  | 0.051326  |
| H | 1.384241  | -1.438719 | -1.033571 |
| B | -2.296996 | -0.011812 | -0.003641 |
| H | -1.868759 | -0.587039 | -1.001603 |
| H | -1.868624 | -0.571986 | 1.002543  |
| H | -1.895012 | 1.151918  | -0.011956 |
| H | -3.522893 | -0.030479 | -0.003530 |

Vibrational frequencies

|           |           |           |
|-----------|-----------|-----------|
| 65.9230   | 106.4329  | 146.7946  |
| 176.9297  | 217.6932  | 240.9004  |
| 370.9980  | 833.6029  | 857.4716  |
| 883.7996  | 922.6462  | 966.5270  |
| 987.0054  | 1059.2605 | 1098.1687 |
| 1100.4530 | 1117.2244 | 1178.2679 |
| 1199.8119 | 1232.2835 | 1237.9047 |
| 1664.1117 | 1866.7132 | 2053.1603 |
| 2175.2262 | 2322.6107 | 2357.2420 |
| 2359.9395 | 2361.7811 | 2627.5275 |
| 2650.1229 | 2714.1077 | 2725.2233 |

**TSIII**

Zero-point correction = 0.094805

Thermal correction to Energy = 0.101778

Thermal correction to Enthalpy = 0.102722

Thermal correction to Gibbs Free Energy = 0.065147

Sum of electronic and zero-point Energies = -80.433506

Sum of electronic and thermal Energies = -80.426534

Sum of electronic and thermal Enthalpies = -80.425590

Sum of electronic and thermal Free Energies = -80.463164

Cartesian coordinates

|   |           |           |           |
|---|-----------|-----------|-----------|
| B | -2.050092 | -0.022803 | 0.044350  |
| H | -3.016645 | -0.505212 | -0.494966 |
| H | -1.199980 | -0.726839 | -0.664381 |
| H | -1.915330 | -0.326620 | 1.199395  |
| B | 1.311443  | -0.761895 | 0.017801  |
| H | 2.221313  | 0.216970  | 0.130427  |
| H | 1.316354  | -1.386916 | 1.045309  |
| H | 1.562660  | -1.374514 | -0.987015 |

|   |           |           |           |
|---|-----------|-----------|-----------|
| H | -1.879648 | 1.143324  | -0.196821 |
| B | 1.034452  | 0.848815  | -0.005649 |
| H | -0.490384 | -0.311369 | -0.292560 |
| H | 1.080204  | 1.481853  | -1.027746 |
| H | 0.842444  | 1.468736  | 1.005846  |

Vibrational frequencies

|           |           |           |
|-----------|-----------|-----------|
| -814.7548 | 36.1835   | 130.5407  |
| 173.7206  | 179.7024  | 250.8855  |
| 513.8826  | 584.6539  | 828.6934  |
| 834.5619  | 900.0778  | 905.7868  |
| 933.7691  | 969.8858  | 1013.2301 |
| 1033.1261 | 1044.1483 | 1114.7838 |
| 1170.7804 | 1192.3480 | 1206.4256 |
| 1212.1128 | 1466.6485 | 1817.4015 |
| 1972.2518 | 2296.6528 | 2504.5091 |
| 2511.4661 | 2548.1783 | 2555.2717 |
| 2560.6323 | 2575.2627 | 2577.1315 |

**B<sub>2</sub>H<sub>5</sub><sup>-</sup> + (η<sup>2</sup>-H<sub>2</sub>)BH<sub>3</sub>**

Zero-point correction = 0.097099

Thermal correction to Energy = 0.105042

Thermal correction to Enthalpy = 0.105986

Thermal correction to Gibbs Free Energy = 0.066231

Sum of electronic and zero-point Energies = -80.434404

Sum of electronic and thermal Energies = -80.426462

Sum of electronic and thermal Enthalpies = -80.425517

Sum of electronic and thermal Free Energies = -80.465272

Cartesian coordinates

|   |           |           |           |
|---|-----------|-----------|-----------|
| B | -2.422554 | 0.001339  | -0.086565 |
| H | -2.784579 | 0.639247  | 0.857035  |
| H | -1.994490 | 0.640992  | -1.005949 |
| H | -3.078595 | -0.946195 | -0.407737 |
| B | 1.276404  | 0.831141  | -0.008582 |
| H | 2.177207  | 0.162139  | 0.762466  |
| H | 1.902270  | 1.651605  | -0.635668 |
| H | 0.447911  | 1.286550  | 0.745320  |
| H | -1.486917 | -0.785682 | 0.550071  |
| B | 1.610730  | -0.751636 | -0.069461 |
| H | -1.059293 | -0.293977 | 0.069089  |
| H | 1.047775  | -1.559189 | 0.633348  |
| H | 2.505809  | -1.199708 | -0.744934 |

Vibrational frequencies



|           |           |           |
|-----------|-----------|-----------|
| 54.9905   | 107.4152  | 123.2148  |
| 135.0902  | 162.4701  | 199.4839  |
| 443.5258  | 513.0684  | 817.2225  |
| 839.3796  | 872.8657  | 885.0556  |
| 897.4329  | 977.2850  | 1024.8750 |
| 1047.6536 | 1094.8709 | 1167.3481 |
| 1199.7990 | 1206.2490 | 1210.6283 |
| 1237.7502 | 1372.8525 | 1764.2960 |
| 1870.4851 | 2473.8634 | 2506.5677 |
| 2513.7797 | 2530.1878 | 2559.1944 |
| 2634.9996 | 2653.1776 | 3524.6004 |

## TSIV

Zero-point correction = 0.092095

Thermal correction to Energy = 0.100615

Thermal correction to Enthalpy = 0.101559

Thermal correction to Gibbs Free Energy = 0.061088

Sum of electronic and zero-point Energies = -80.424414

Sum of electronic and thermal Energies = -80.415895

Sum of electronic and thermal Enthalpies = -80.414951

Sum of electronic and thermal Free Energies = -80.455421

Cartesian coordinates

|   |           |           |           |
|---|-----------|-----------|-----------|
| B | 2.286570  | 0.189921  | -0.335929 |
| H | 3.163747  | -0.527975 | 0.023221  |
| H | 1.435382  | -1.763608 | 1.469606  |
| H | 1.782898  | 0.026561  | -1.398309 |
| B | -1.547089 | -0.549220 | -0.440080 |
| H | -2.325913 | 0.303029  | 0.277768  |
| H | -1.917011 | -0.469405 | -1.587814 |
| H | -1.670438 | -1.640134 | 0.065957  |
| H | 1.958859  | 1.108501  | 0.342694  |
| B | -1.036054 | 0.738420  | 0.398498  |
| H | 0.814867  | -1.456534 | 1.196228  |
| H | -0.761465 | 0.674844  | 1.574423  |
| H | -0.998062 | 1.849117  | -0.076214 |

Vibrational frequencies

|           |           |           |
|-----------|-----------|-----------|
| -189.0849 | 65.9533   | 109.8566  |
| 129.1758  | 139.2659  | 151.7465  |
| 242.5255  | 293.0642  | 370.5857  |
| 509.8509  | 543.6794  | 788.7950  |
| 806.9276  | 843.7020  | 881.3012  |
| 896.3835  | 977.8799  | 1048.1671 |
| 1121.0953 | 1161.9037 | 1195.1357 |

|           |           |           |
|-----------|-----------|-----------|
| 1204.4023 | 1206.7004 | 1365.5904 |
| 1852.3693 | 2474.1312 | 2508.4625 |
| 2510.5138 | 2524.4968 | 2617.1142 |
| 2724.3443 | 2748.1266 | 4411.8424 |

## TSIV'

Zero-point correction = 0.095584

Thermal correction to Energy = 0.102632

Thermal correction to Enthalpy = 0.103576

Thermal correction to Gibbs Free Energy = 0.066530

Sum of electronic and zero-point Energies = -80.429144

Sum of electronic and thermal Energies = -80.422097

Sum of electronic and thermal Enthalpies = -80.421152

Sum of electronic and thermal Free Energies = -80.458199

Cartesian coordinates

|   |           |           |           |
|---|-----------|-----------|-----------|
| B | 1.970760  | -0.049623 | 0.039212  |
| H | 1.673072  | 1.105276  | 0.034694  |
| H | 1.852381  | -0.649498 | -0.995404 |
| H | 1.892912  | -0.686462 | 1.048938  |
| B | -1.325529 | 0.822578  | -0.005762 |
| H | -2.473319 | 0.096534  | -0.205969 |
| H | -1.518229 | 1.497820  | 0.981739  |
| H | -1.121865 | 1.442285  | -1.026753 |
| H | 3.449256  | 0.259292  | 0.302997  |
| B | -1.459674 | -0.791012 | 0.011874  |
| H | 3.420499  | -0.110053 | -0.384927 |
| H | -1.347500 | -1.457775 | -0.994414 |
| H | -1.754994 | -1.407133 | 1.012475  |

Vibrational frequencies

|           |           |           |
|-----------|-----------|-----------|
| -149.2422 | 115.8973  | 121.0883  |
| 157.3320  | 208.4799  | 246.7705  |
| 503.7072  | 526.5672  | 543.9145  |
| 793.3113  | 835.2263  | 878.1022  |
| 903.3409  | 929.1150  | 976.3287  |
| 1012.4514 | 1048.8338 | 1157.0201 |
| 1164.0274 | 1172.4973 | 1183.0837 |
| 1208.9233 | 1322.7483 | 1423.9986 |
| 1822.7207 | 2452.2420 | 2484.1598 |
| 2491.0432 | 2502.6659 | 2557.5293 |
| 2636.6869 | 2687.0766 | 3889.6861 |

## H<sub>2</sub>

Zero-point correction = 0.010162  
 Thermal correction to Energy = 0.012522  
 Thermal correction to Enthalpy = 0.013466  
 Thermal correction to Gibbs Free Energy = -0.001320  
 Sum of electronic and zero-point Energies = -1.157684  
 Sum of electronic and thermal Energies = -1.155324  
 Sum of electronic and thermal Enthalpies = -1.154380  
 Sum of electronic and thermal Free Energies = -1.169166

Cartesian coordinates

|   |          |          |           |
|---|----------|----------|-----------|
| H | 0.000000 | 0.000000 | 0.370376  |
| H | 0.000000 | 0.000000 | -0.370376 |

Vibrational frequencies

4460.5004

**B<sub>3</sub>H<sub>8</sub><sup>-</sup>**

Zero-point correction = 0.083331  
 Thermal correction to Energy = 0.088124  
 Thermal correction to Enthalpy = 0.089069  
 Thermal correction to Gibbs Free Energy = 0.057786  
 Sum of electronic and zero-point Energies = -79.338604  
 Sum of electronic and thermal Energies = -79.333811  
 Sum of electronic and thermal Enthalpies = -79.332867  
 Sum of electronic and thermal Free Energies = -79.364150

Cartesian coordinates

|   |           |           |           |
|---|-----------|-----------|-----------|
| B | 0.911473  | -0.538307 | 0.000007  |
| H | 1.312033  | -1.027881 | 1.023825  |
| H | 1.312718  | -1.028181 | -1.023434 |
| H | 1.423179  | 0.612648  | 0.000330  |
| B | -0.912138 | -0.537603 | -0.000098 |
| H | 0.001198  | 1.637764  | -1.017620 |
| H | -1.313155 | -1.028523 | -1.023051 |
| H | -1.312607 | -1.025182 | 1.024702  |
| B | 0.000649  | 0.997687  | -0.000150 |
| H | -1.423136 | 0.613702  | -0.001562 |
| H | -0.000153 | 1.636766  | 1.018014  |

Vibrational frequencies

|           |           |           |
|-----------|-----------|-----------|
| 186.9607  | 422.0440  | 539.4918  |
| 540.6254  | 700.6161  | 716.4494  |
| 798.3789  | 806.4464  | 821.0250  |
| 881.6059  | 991.6920  | 1029.8899 |
| 1069.6160 | 1153.8506 | 1168.1755 |

|           |           |           |
|-----------|-----------|-----------|
| 1168.6364 | 1201.0340 | 1274.5156 |
| 1424.0542 | 2224.0403 | 2255.6507 |
| 2495.5174 | 2502.4464 | 2537.2050 |
| 2543.9076 | 2550.6956 | 2573.6945 |

**BH<sub>4</sub><sup>-</sup> + DMS·BH<sub>3</sub>**

Zero-point correction = 0.144509

Thermal correction to Energy = 0.155575

Thermal correction to Enthalpy = 0.156519

Thermal correction to Gibbs Free Energy = 0.107825

Sum of electronic and zero-point Energies = -531.809402

Sum of electronic and thermal Energies = -531.798336

Sum of electronic and thermal Enthalpies = -531.797392

Sum of electronic and thermal Free Energies = -531.846086

Cartesian coordinates

|   |           |           |           |
|---|-----------|-----------|-----------|
| B | -2.559950 | -0.102528 | 0.107730  |
| H | -2.970329 | -1.141488 | -0.346916 |
| H | -3.083181 | 0.872034  | -0.373851 |
| H | -2.490334 | -0.082544 | 1.313125  |
| S | -0.704298 | -0.003950 | -0.515501 |
| C | 0.095910  | -1.335613 | 0.402722  |
| H | 1.170295  | -1.289709 | 0.229123  |
| H | -0.135809 | -1.228635 | 1.462675  |
| H | -0.306458 | -2.274844 | 0.023582  |
| C | -0.075427 | 1.431359  | 0.379521  |
| H | -0.287585 | 1.310362  | 1.442165  |
| H | 0.994727  | 1.520833  | 0.201247  |
| H | -0.596157 | 2.306333  | -0.008854 |
| B | 3.518416  | 0.001744  | -0.103239 |
| H | 4.547208  | 0.642583  | -0.272241 |
| H | 2.727569  | 0.238181  | -1.011671 |
| H | 3.775029  | -1.196453 | -0.092898 |
| H | 3.008558  | 0.315988  | 0.966614  |

Vibrational frequencies

|           |           |           |
|-----------|-----------|-----------|
| 16.8169   | 83.0406   | 100.4574  |
| 140.3302  | 171.2096  | 176.1710  |
| 191.6645  | 214.7613  | 231.2431  |
| 239.8515  | 252.8824  | 280.0017  |
| 519.4943  | 718.8802  | 759.6712  |
| 807.1167  | 816.9630  | 944.8024  |
| 1009.6117 | 1031.0234 | 1064.1489 |
| 1095.7375 | 1100.5662 | 1108.1202 |
| 1109.4592 | 1176.1411 | 1178.8983 |

|           |           |           |
|-----------|-----------|-----------|
| 1229.5906 | 1236.5645 | 1349.7950 |
| 1376.6159 | 1445.9956 | 1456.1255 |
| 1461.8307 | 1467.4214 | 2358.0587 |
| 2362.3402 | 2365.8882 | 2373.4270 |
| 2483.6831 | 2535.4611 | 2545.9715 |
| 3065.1503 | 3069.3368 | 3167.6365 |
| 3172.0341 | 3181.3671 | 3188.8417 |

## TSV

Zero-point correction = 0.143346

Thermal correction to Energy = 0.154099

Thermal correction to Enthalpy = 0.155043

Thermal correction to Gibbs Free Energy = 0.107606

Sum of electronic and zero-point Energies = -531.783240

Sum of electronic and thermal Energies = -531.772487

Sum of electronic and thermal Enthalpies = -531.771543

Sum of electronic and thermal Free Energies = -531.818980

Cartesian coordinates

|   |           |           |           |
|---|-----------|-----------|-----------|
| B | -1.306645 | -0.079633 | -0.532109 |
| H | -1.291771 | -1.203178 | -0.937980 |
| H | -1.415617 | 0.830107  | -1.296760 |
| H | -1.211838 | 0.130237  | 0.639339  |
| S | 1.278982  | -0.001504 | -0.598823 |
| C | 1.495886  | -1.355428 | 0.580544  |
| H | 2.494140  | -1.327304 | 1.018888  |
| H | 0.735857  | -1.290742 | 1.361466  |
| H | 1.368605  | -2.291274 | 0.036232  |
| C | 1.482362  | 1.396319  | 0.531363  |
| H | 0.756728  | 1.322293  | 1.343033  |
| H | 2.497174  | 1.427559  | 0.929454  |
| H | 1.289254  | 2.307762  | -0.035035 |
| B | -4.120229 | 0.033167  | 0.286846  |
| H | -5.150576 | -0.262854 | -0.299713 |
| H | -4.096893 | 1.226009  | 0.545584  |
| H | -3.999342 | -0.631363 | 1.304141  |
| H | -3.174554 | -0.226203 | -0.472602 |

Vibrational frequencies

|           |          |          |
|-----------|----------|----------|
| -425.8532 | 64.0081  | 84.7656  |
| 113.3651  | 134.9739 | 159.0089 |
| 165.7427  | 181.1061 | 195.1961 |
| 218.5292  | 269.5859 | 286.9593 |
| 303.4745  | 720.2618 | 770.1969 |
| 801.9974  | 811.9867 | 933.9217 |

|           |           |           |
|-----------|-----------|-----------|
| 980.8309  | 982.6174  | 1008.2395 |
| 1064.0058 | 1084.8624 | 1091.9669 |
| 1117.0769 | 1156.0129 | 1162.4027 |
| 1211.2724 | 1227.9938 | 1354.5852 |
| 1378.1979 | 1451.7425 | 1457.4939 |
| 1465.7374 | 1475.0081 | 2219.8741 |
| 2381.6693 | 2400.4918 | 2406.6327 |
| 2560.3777 | 2662.9798 | 2672.3238 |
| 3054.9165 | 3058.4448 | 3146.9805 |
| 3152.9215 | 3158.7432 | 3160.3064 |

### DMS·BH<sub>3</sub>

Zero-point correction = 0.107701

Thermal correction to Energy = 0.114783

Thermal correction to Enthalpy = 0.115727

Thermal correction to Gibbs Free Energy = 0.077623

Sum of electronic and zero-point Energies = -504.513032

Sum of electronic and thermal Energies = -504.505951

Sum of electronic and thermal Enthalpies = -504.505007

Sum of electronic and thermal Free Energies = -504.543111

Cartesian coordinates

|   |           |           |           |
|---|-----------|-----------|-----------|
| S | -0.017002 | -0.000253 | -0.541551 |
| C | 0.810384  | -1.380250 | 0.274512  |
| H | 0.693350  | -1.282096 | 1.354123  |
| H | 0.330793  | -2.296928 | -0.068377 |
| H | 1.862841  | -1.388796 | -0.006685 |
| C | 0.802475  | 1.384753  | 0.274370  |
| H | 1.856806  | 1.393510  | 0.000265  |
| H | 0.324190  | 2.299364  | -0.075596 |
| H | 0.678486  | 1.290959  | 1.353559  |
| B | -1.794491 | -0.004693 | 0.306759  |
| H | -2.306435 | -1.012905 | -0.109097 |
| H | -1.565899 | -0.009106 | 1.491186  |
| H | -2.306806 | 1.006487  | -0.101657 |

Vibrational frequencies

|           |           |           |
|-----------|-----------|-----------|
| 87.8181   | 173.2941  | 176.8263  |
| 224.0838  | 243.1282  | 280.1673  |
| 498.7042  | 710.1589  | 748.3708  |
| 807.2041  | 824.7004  | 946.0416  |
| 1003.1203 | 1021.6531 | 1067.9395 |
| 1109.9238 | 1169.7476 | 1174.4113 |
| 1354.2024 | 1379.5003 | 1444.5881 |
| 1449.4313 | 1453.5977 | 1459.2712 |

|           |           |           |
|-----------|-----------|-----------|
| 2491.8583 | 2549.3193 | 2560.7098 |
| 3071.8497 | 3074.5755 | 3173.0054 |
| 3174.3249 | 3184.9351 | 3187.0079 |

**BH<sub>3</sub>(μ-H)BH<sub>3</sub> + DMS·BH<sub>3</sub>**

Zero-point correction = 0.177999

Thermal correction to Energy = 0.191030

Thermal correction to Enthalpy = 0.191974

Thermal correction to Gibbs Free Energy = 0.139525

Sum of electronic and zero-point Energies = -558.410656

Sum of electronic and thermal Energies = -558.397625

Sum of electronic and thermal Enthalpies = -558.396681

Sum of electronic and thermal Free Energies = -558.449130

Cartesian coordinates

|   |           |           |           |
|---|-----------|-----------|-----------|
| B | -2.990522 | 0.221695  | 0.284960  |
| H | -3.468148 | 1.024354  | -0.477940 |
| H | -2.748486 | 0.664612  | 1.381796  |
| H | -3.570910 | -0.835929 | 0.295534  |
| S | -1.244122 | -0.199622 | -0.497347 |
| C | -0.483808 | -1.226573 | 0.778211  |
| H | 0.548462  | -1.438018 | 0.502972  |
| H | -0.537434 | -0.705794 | 1.734533  |
| H | -1.056321 | -2.153130 | 0.823032  |
| C | -0.334087 | 1.343745  | -0.270734 |
| H | -0.358336 | 1.624364  | 0.782481  |
| H | 0.688859  | 1.210300  | -0.617183 |
| H | -0.837118 | 2.100528  | -0.872642 |
| B | 2.940723  | -0.760893 | -0.866743 |
| H | 3.007793  | -1.626936 | -0.038045 |
| H | 1.882219  | -0.742635 | -1.456583 |
| H | 3.899640  | -0.708064 | -1.599078 |
| B | 3.074931  | 0.738738  | 0.866911  |
| H | 2.144358  | 0.296714  | 1.489436  |
| H | 2.995338  | 1.936311  | 0.692994  |
| H | 4.158600  | 0.384159  | 1.251144  |
| H | 2.939156  | 0.462384  | -0.405406 |

Vibrational frequencies

|          |          |          |
|----------|----------|----------|
| 54.9567  | 65.3248  | 83.6962  |
| 99.0701  | 119.2964 | 143.4101 |
| 162.1814 | 198.1050 | 232.0049 |
| 239.7852 | 244.7185 | 247.1360 |
| 261.3413 | 291.7276 | 304.7508 |
| 520.8384 | 663.9410 | 719.5553 |

|           |           |           |
|-----------|-----------|-----------|
| 763.3799  | 816.1219  | 820.3972  |
| 822.1331  | 879.9252  | 952.0285  |
| 999.2762  | 1006.2651 | 1026.5150 |
| 1055.6024 | 1067.2343 | 1115.8885 |
| 1125.1380 | 1175.8121 | 1180.1323 |
| 1182.8338 | 1183.0558 | 1190.0178 |
| 1204.3793 | 1353.3564 | 1378.3526 |
| 1448.3841 | 1455.7164 | 1459.3974 |
| 1466.2400 | 1570.1689 | 2211.7875 |
| 2467.9161 | 2475.9184 | 2488.1652 |
| 2513.0984 | 2532.0852 | 2542.8843 |
| 2547.5940 | 2566.3594 | 2571.0556 |
| 3069.7972 | 3074.5477 | 3173.1191 |
| 3174.3262 | 3184.0285 | 3190.3947 |

## TSVI

Zero-point correction = 0.175589

Thermal correction to Energy = 0.188995

Thermal correction to Enthalpy = 0.189939

Thermal correction to Gibbs Free Energy = 0.135131

Sum of electronic and zero-point Energies = -558.382554

Sum of electronic and thermal Energies = -558.369148

Sum of electronic and thermal Enthalpies = -558.368204

Sum of electronic and thermal Free Energies = -558.423012

Cartesian coordinates

|   |           |           |           |
|---|-----------|-----------|-----------|
| B | 0.518295  | 0.007676  | -0.559276 |
| H | 0.532968  | 1.043541  | -1.151690 |
| H | 0.561511  | -1.023363 | -1.158741 |
| H | 0.402378  | 0.002209  | 0.628538  |
| S | -2.140521 | -0.014086 | -0.603292 |
| C | -2.322284 | 1.372472  | 0.544613  |
| H | -3.320314 | 1.381036  | 0.984408  |
| H | -1.563803 | 1.308657  | 1.326910  |
| H | -2.172199 | 2.291936  | -0.021697 |
| C | -2.320442 | -1.378848 | 0.570189  |
| H | -1.555408 | -1.306480 | 1.345365  |
| H | -3.314705 | -1.373316 | 1.018573  |
| H | -2.181189 | -2.309214 | 0.019205  |
| B | 3.133015  | 0.090507  | 0.370438  |
| H | 3.031538  | 1.118826  | 0.983593  |
| H | 2.338906  | 0.023464  | -0.565178 |
| H | 3.139608  | -0.915827 | 1.021419  |
| B | 5.361908  | -0.069253 | -0.025069 |



|   |          |           |           |
|---|----------|-----------|-----------|
| H | 5.909839 | 0.753340  | -0.723457 |
| H | 5.543625 | -1.205566 | -0.384624 |
| H | 5.537053 | 0.116481  | 1.148656  |
| H | 4.148801 | 0.213254  | -0.437885 |

Vibrational frequencies

|           |           |           |
|-----------|-----------|-----------|
| -369.1173 | 39.7789   | 61.7140   |
| 68.6545   | 81.9916   | 91.9638   |
| 122.9235  | 130.0324  | 160.6038  |
| 170.1758  | 174.3737  | 208.4550  |
| 232.4926  | 281.8849  | 293.5308  |
| 313.2036  | 661.8521  | 719.8483  |
| 768.2642  | 787.8700  | 791.1425  |
| 826.6116  | 882.5796  | 931.0434  |
| 975.2040  | 990.3581  | 1001.5301 |
| 1008.0704 | 1061.2163 | 1079.4551 |
| 1128.2772 | 1142.8443 | 1158.8935 |
| 1160.1289 | 1175.6080 | 1182.7600 |
| 1203.7810 | 1352.7533 | 1376.0754 |
| 1449.0957 | 1455.5493 | 1462.5382 |
| 1469.0659 | 1600.1269 | 2173.9695 |
| 2335.7789 | 2481.6850 | 2524.6671 |
| 2538.7254 | 2566.2631 | 2567.7689 |
| 2594.7945 | 2671.6433 | 2675.8871 |
| 3050.7814 | 3054.8164 | 3142.5906 |
| 3147.8839 | 3155.0708 | 3158.0037 |

**B<sub>3</sub>H<sub>10</sub><sup>-</sup>**

Zero-point correction = 0.101030

Thermal correction to Energy = 0.108116

Thermal correction to Enthalpy = 0.109061

Thermal correction to Gibbs Free Energy = 0.071929

Sum of electronic and zero-point Energies = -80.483031

Sum of electronic and thermal Energies = -80.475944

Sum of electronic and thermal Enthalpies = -80.475000

Sum of electronic and thermal Free Energies = -80.512131

Cartesian coordinates

|   |          |           |           |
|---|----------|-----------|-----------|
| B | 1.979976 | -0.329297 | 0.004690  |
| H | 2.172105 | -0.520094 | 1.175357  |
| H | 2.180669 | -1.291465 | -0.695619 |
| H | 2.442296 | 0.687986  | -0.433557 |
| B | 0.017303 | 0.688853  | -0.002674 |
| H | 0.378973 | 1.442335  | 0.847507  |
| H | 0.671818 | -0.398833 | -0.175847 |

|   |           |           |           |
|---|-----------|-----------|-----------|
| H | -0.222817 | 1.142152  | -1.074740 |
| B | -1.991359 | -0.326607 | -0.008074 |
| H | -2.371947 | -0.962253 | 0.945419  |
| H | -1.689377 | -1.004055 | -0.951274 |
| H | -2.667838 | 0.633921  | -0.259172 |
| H | -0.923485 | 0.105557  | 0.652217  |

Vibrational frequencies

|           |           |           |
|-----------|-----------|-----------|
| 77.9657   | 92.1161   | 190.1388  |
| 250.3605  | 273.9731  | 323.3465  |
| 514.1956  | 651.5318  | 765.1322  |
| 807.2866  | 904.8504  | 961.0121  |
| 1019.3449 | 1032.4897 | 1104.9544 |
| 1105.0137 | 1170.7098 | 1182.2116 |
| 1184.6064 | 1193.6731 | 1202.0199 |
| 1623.7308 | 1681.4280 | 2151.1786 |
| 2261.6195 | 2510.2843 | 2511.1808 |
| 2561.7800 | 2565.2004 | 2589.5781 |
| 2593.5393 | 2608.9538 | 2681.4412 |

**TSVII**

Zero-point correction = 0.098838

Thermal correction to Energy = 0.105580

Thermal correction to Enthalpy = 0.106524

Thermal correction to Gibbs Free Energy = 0.069282

Sum of electronic and zero-point Energies = -80.472187

Sum of electronic and thermal Energies = -80.465445

Sum of electronic and thermal Enthalpies = -80.464501

Sum of electronic and thermal Free Energies = -80.501742

Cartesian coordinates

|   |           |           |           |
|---|-----------|-----------|-----------|
| B | -2.049922 | -0.268177 | -0.000151 |
| H | -1.879169 | -0.959919 | -0.986118 |
| H | -1.916125 | -0.904090 | 1.028145  |
| H | -3.105942 | 0.335739  | -0.036269 |
| B | 1.703448  | -0.545472 | -0.000068 |
| H | 2.067442  | 0.631560  | 0.004446  |
| H | 1.977448  | -1.082791 | 1.030681  |
| H | 1.982027  | -1.076629 | -1.032830 |
| H | -1.156489 | 0.612438  | -0.007980 |
| B | 0.499872  | 0.840877  | 0.000245  |
| H | 0.417205  | -0.483797 | -0.002536 |
| H | 0.426476  | 1.397907  | -1.044737 |
| H | 0.420138  | 1.393441  | 1.047073  |

Vibrational frequencies

|           |           |           |
|-----------|-----------|-----------|
| -477.5982 | 35.6391   | 94.5557   |
| 142.7098  | 319.1180  | 411.9709  |
| 439.7591  | 510.3780  | 813.5164  |
| 846.3966  | 939.9822  | 945.5790  |
| 982.5501  | 1075.7821 | 1080.3008 |
| 1113.4761 | 1128.3328 | 1143.5327 |
| 1174.0915 | 1192.8956 | 1220.0030 |
| 1284.8449 | 1818.0915 | 2137.9602 |
| 2193.6640 | 2414.1905 | 2418.4624 |
| 2445.7197 | 2450.2460 | 2580.4408 |
| 2644.3737 | 2646.6030 | 2739.6994 |

### **BH<sub>4</sub><sup>-</sup> + B<sub>2</sub>H<sub>6</sub>**

Zero-point correction = 0.099886

Thermal correction to Energy = 0.107401

Thermal correction to Enthalpy = 0.108345

Thermal correction to Gibbs Free Energy = 0.069647

Sum of electronic and zero-point Energies = -80.482685

Sum of electronic and thermal Energies = -80.475170

Sum of electronic and thermal Enthalpies = -80.474226

Sum of electronic and thermal Free Energies = -80.512924

Cartesian coordinates

|   |           |           |           |
|---|-----------|-----------|-----------|
| B | -1.264630 | 0.874790  | 0.001393  |
| H | -1.224932 | 1.454140  | 1.037068  |
| H | -1.301989 | 1.453384  | -1.034625 |
| B | -1.308966 | -0.862472 | 0.001209  |
| H | -1.371811 | -1.439260 | -1.035022 |
| H | -0.303376 | -0.019135 | -0.031543 |
| H | -2.276483 | 0.029714  | 0.038961  |
| H | -1.295721 | -1.443952 | 1.037076  |
| B | 2.296998  | -0.011794 | -0.002788 |
| H | 1.867055  | -0.576273 | 1.000299  |
| H | 1.870323  | -0.582725 | -1.003860 |
| H | 1.897019  | 1.151935  | -0.006827 |
| H | 3.522903  | -0.030450 | -0.000591 |

Vibrational frequencies

|           |           |           |
|-----------|-----------|-----------|
| 64.0568   | 87.8707   | 146.0692  |
| 179.7318  | 216.6315  | 236.8580  |
| 368.3109  | 833.5517  | 856.1440  |
| 882.4472  | 922.5063  | 965.0916  |
| 985.7801  | 1057.1633 | 1098.0475 |
| 1101.1982 | 1116.6021 | 1178.0179 |
| 1199.7025 | 1233.5715 | 1236.7990 |

|           |           |           |
|-----------|-----------|-----------|
| 1663.4623 | 1866.0809 | 2052.6736 |
| 2175.2447 | 2327.0809 | 2357.4075 |
| 2360.2337 | 2361.5886 | 2627.0520 |
| 2649.7099 | 2713.4337 | 2724.8317 |

### TSVIII

Zero-point correction = 0.097460

Thermal correction to Energy = 0.103908

Thermal correction to Enthalpy = 0.104853

Thermal correction to Gibbs Free Energy = 0.069708

Sum of electronic and zero-point Energies = -80.433621

Sum of electronic and thermal Energies = -80.427173

Sum of electronic and thermal Enthalpies = -80.426229

Sum of electronic and thermal Free Energies = -80.461373

Cartesian coordinates

|   |           |           |           |
|---|-----------|-----------|-----------|
| B | -0.201877 | 0.750691  | -0.156461 |
| H | 1.435055  | -0.756224 | -1.093318 |
| H | -0.256000 | 1.424524  | -1.136579 |
| H | -0.363443 | 1.778194  | 0.695150  |
| B | 1.640312  | -0.368791 | 0.021530  |
| H | 2.690305  | 0.219874  | 0.136100  |
| H | 0.977020  | 0.753897  | 0.322236  |
| H | 1.415448  | -1.154386 | 0.899679  |
| B | -1.418621 | -0.546409 | -0.002921 |
| H | -0.910302 | 1.083681  | 0.860027  |
| H | -2.537638 | -0.072476 | -0.151886 |
| H | -1.183591 | -1.324134 | -0.910094 |
| H | -1.365922 | -1.130398 | 1.067946  |

Vibrational frequencies

|           |           |           |
|-----------|-----------|-----------|
| -497.9241 | 123.3472  | 162.5773  |
| 230.7190  | 271.7481  | 334.0134  |
| 495.2875  | 652.7331  | 685.6709  |
| 792.9598  | 809.1733  | 867.4462  |
| 939.2910  | 970.1680  | 1050.6393 |
| 1087.8753 | 1110.1936 | 1176.2333 |
| 1179.0792 | 1191.8340 | 1194.6944 |
| 1255.7982 | 1683.0885 | 2183.8874 |
| 2222.8193 | 2357.6798 | 2390.0694 |
| 2414.6323 | 2491.7545 | 2561.9805 |
| 2605.9886 | 2615.9160 | 2670.9068 |

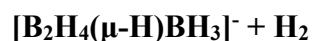

Zero-point correction = 0.099148  
Thermal correction to Energy = 0.105786  
Thermal correction to Enthalpy = 0.106730  
Thermal correction to Gibbs Free Energy = 0.071452  
Sum of electronic and zero-point Energies = -80.433935  
Sum of electronic and thermal Energies = -80.427297  
Sum of electronic and thermal Enthalpies = -80.426353  
Sum of electronic and thermal Free Energies = -80.461631

Cartesian coordinates

|   |           |           |           |
|---|-----------|-----------|-----------|
| B | 0.202756  | 0.443822  | 0.191980  |
| H | -2.165528 | -1.044176 | -0.912982 |
| H | -0.042365 | 1.010098  | 1.206768  |
| H | -0.190043 | 1.516478  | -0.575832 |
| B | -1.885706 | -0.275037 | -0.024255 |
| H | -2.020284 | -0.734229 | 1.076927  |
| H | -0.577944 | -0.409438 | -0.322763 |
| H | -2.343099 | 0.822907  | -0.181179 |
| B | 1.764842  | -0.326735 | -0.025437 |
| H | 0.532544  | 1.194830  | -0.854809 |
| H | 2.671285  | 0.456217  | 0.232816  |
| H | 1.796777  | -1.251070 | 0.773751  |
| H | 1.929197  | -0.771865 | -1.154140 |

Vibrational frequencies

|           |           |           |
|-----------|-----------|-----------|
| 160.8503  | 195.5320  | 219.5708  |
| 269.0801  | 302.1765  | 419.1984  |
| 569.8474  | 654.7538  | 706.4156  |
| 758.3376  | 821.2778  | 824.5094  |
| 890.7541  | 1030.4319 | 1056.9802 |
| 1083.3784 | 1107.5738 | 1182.2444 |
| 1188.7643 | 1191.3101 | 1194.5436 |
| 1226.5696 | 1609.7012 | 2020.8183 |
| 2212.3770 | 2354.8038 | 2366.8052 |
| 2377.0985 | 2504.1542 | 2565.0682 |
| 2593.4188 | 2667.5497 | 3195.0213 |

## **TSIX**

Zero-point correction = 0.095801  
Thermal correction to Energy = 0.102543  
Thermal correction to Enthalpy = 0.103487  
Thermal correction to Gibbs Free Energy = 0.067733  
Sum of electronic and zero-point Energies = -80.433906  
Sum of electronic and thermal Energies = -80.427164  
Sum of electronic and thermal Enthalpies = -80.426220

Sum of electronic and thermal Free Energies = -80.461974

Cartesian coordinates

|   |           |           |           |
|---|-----------|-----------|-----------|
| B | -0.182442 | 0.530136  | -0.243187 |
| H | 1.854845  | -1.096239 | 0.979942  |
| H | 0.070356  | 1.182341  | -1.209683 |
| H | -0.224315 | 2.017186  | 0.526344  |
| B | 1.723423  | -0.346254 | 0.047944  |
| H | 1.297589  | -0.878847 | -0.942192 |
| H | 0.816618  | 0.426197  | 0.588798  |
| H | 2.633468  | 0.415864  | -0.147435 |
| B | -1.545945 | -0.472019 | 0.030692  |
| H | -0.796241 | 1.570127  | 0.803146  |
| H | -2.583165 | 0.105455  | -0.275640 |
| H | -1.419193 | -1.451497 | -0.694293 |
| H | -1.625146 | -0.849900 | 1.193770  |

Vibrational frequencies

|           |           |           |
|-----------|-----------|-----------|
| -485.2655 | 79.0361   | 178.2138  |
| 252.7080  | 332.3731  | 358.8958  |
| 413.5799  | 519.6882  | 557.6600  |
| 664.7156  | 744.9214  | 802.3515  |
| 833.7785  | 919.0012  | 1006.7581 |
| 1025.5117 | 1090.1587 | 1111.0880 |
| 1169.6784 | 1177.5407 | 1181.7747 |
| 1188.9730 | 1210.7900 | 1788.8261 |
| 2130.1539 | 2351.6596 | 2360.1928 |
| 2377.0026 | 2505.5530 | 2563.5985 |
| 2581.7604 | 2655.2717 | 3918.7470 |

### **B<sub>3</sub>H<sub>8</sub><sup>-</sup>(I)**

Zero-point correction = 0.082660

Thermal correction to Energy = 0.087892

Thermal correction to Enthalpy = 0.088836

Thermal correction to Gibbs Free Energy = 0.056455

Sum of electronic and zero-point Energies = -79.311216

Sum of electronic and thermal Energies = -79.305984

Sum of electronic and thermal Enthalpies = -79.305040

Sum of electronic and thermal Free Energies = -79.337421

Cartesian coordinates

|   |           |           |           |
|---|-----------|-----------|-----------|
| B | 1.553072  | 0.214493  | 0.000001  |
| H | 2.188923  | -0.142822 | -0.988266 |
| H | 2.189371  | -0.143096 | 0.987851  |
| B | 0.027579  | -0.548132 | 0.000113  |
| H | -0.799805 | -0.078839 | 0.973524  |

|   |           |           |           |
|---|-----------|-----------|-----------|
| B | -1.561356 | 0.266280  | -0.000080 |
| H | -1.631428 | 1.457526  | -0.000236 |
| H | -2.562894 | -0.381404 | -0.000073 |
| H | -0.799648 | -0.079021 | -0.973490 |
| H | 1.473587  | 1.439094  | 0.000231  |
| H | -0.154584 | -1.734642 | 0.000287  |

Vibrational frequencies

|           |           |           |
|-----------|-----------|-----------|
| 180.6593  | 215.7847  | 358.8970  |
| 493.4024  | 607.8995  | 722.6904  |
| 815.2763  | 855.6483  | 872.4140  |
| 943.1245  | 952.3398  | 1053.5120 |
| 1059.8322 | 1114.5113 | 1172.1840 |
| 1176.9613 | 1192.8311 | 1633.2103 |
| 1728.3307 | 2091.8133 | 2200.7962 |
| 2328.6641 | 2336.0325 | 2344.0367 |
| 2565.7843 | 2601.4990 | 2665.4366 |

**TSX**

Zero-point correction = 0.080593

Thermal correction to Energy = 0.085522

Thermal correction to Enthalpy = 0.086467

Thermal correction to Gibbs Free Energy = 0.054713

Sum of electronic and zero-point Energies = -79.296615

Sum of electronic and thermal Energies = -79.291685

Sum of electronic and thermal Enthalpies = -79.290741

Sum of electronic and thermal Free Energies = -79.322495

Cartesian coordinates

|   |           |           |           |
|---|-----------|-----------|-----------|
| B | -0.176591 | -0.538071 | -0.035401 |
| H | 0.693590  | -0.004742 | 0.831370  |
| H | -0.051673 | -1.727034 | -0.049754 |
| B | -1.563803 | 0.288494  | -0.071083 |
| H | -1.600668 | 1.480348  | 0.112859  |
| H | -2.583970 | -0.241178 | -0.437083 |
| H | -1.243018 | -0.279870 | 1.056932  |
| H | 2.534665  | -0.369557 | 0.415895  |
| B | 1.603264  | 0.236564  | -0.043978 |
| H | 1.685860  | 1.433501  | -0.067676 |
| H | 1.250862  | -0.226399 | -1.110236 |

Vibrational frequencies

|           |          |           |
|-----------|----------|-----------|
| -497.0686 | 198.8715 | 377.6529  |
| 451.4222  | 467.3824 | 525.9009  |
| 731.7435  | 798.7110 | 881.9825  |
| 938.4117  | 969.4418 | 1023.4918 |

|           |           |           |
|-----------|-----------|-----------|
| 1089.8761 | 1110.3732 | 1137.0156 |
| 1167.4090 | 1186.7950 | 1218.4828 |
| 1809.5764 | 1943.9302 | 2095.2793 |
| 2484.6658 | 2490.3715 | 2529.5052 |
| 2544.8159 | 2584.3962 | 2618.5196 |

### **B<sub>3</sub>H<sub>8</sub>(II)**

Zero-point correction = 0.081513

Thermal correction to Energy = 0.087035

Thermal correction to Enthalpy = 0.087979

Thermal correction to Gibbs Free Energy = 0.054993

Sum of electronic and zero-point Energies = -79.297412

Sum of electronic and thermal Energies = -79.291890

Sum of electronic and thermal Enthalpies = -79.290945

Sum of electronic and thermal Free Energies = -79.323932

Cartesian coordinates

|   |           |           |           |
|---|-----------|-----------|-----------|
| B | -0.280067 | 0.617346  | 0.001191  |
| H | 0.708454  | 0.233068  | -0.736292 |
| H | -0.206751 | 1.796207  | 0.174987  |
| B | -1.543660 | -0.359216 | 0.097498  |
| H | -1.482585 | -1.515735 | -0.224464 |
| H | -2.626117 | 0.063714  | 0.408807  |
| H | -1.161546 | 0.383456  | -1.003360 |
| H | 2.548749  | 0.225402  | -0.581312 |
| B | 1.640834  | -0.244280 | 0.061900  |
| H | 1.529717  | -1.438256 | -0.025856 |
| H | 1.604544  | 0.182895  | 1.184547  |

Vibrational frequencies

|           |           |           |
|-----------|-----------|-----------|
| 163.5283  | 232.9564  | 298.4432  |
| 419.0843  | 448.0166  | 703.5911  |
| 775.4293  | 798.2819  | 859.1721  |
| 917.1514  | 984.4327  | 1043.8469 |
| 1063.6505 | 1102.5796 | 1177.7802 |
| 1197.1180 | 1202.4076 | 1301.6661 |
| 1742.8811 | 1855.8393 | 2123.9510 |
| 2499.5244 | 2531.8792 | 2552.0168 |
| 2577.0103 | 2579.8802 | 2628.0565 |

### **TSXI**

Zero-point correction = 0.080706

Thermal correction to Energy = 0.085677

Thermal correction to Enthalpy = 0.086621



Thermal correction to Gibbs Free Energy = 0.054719  
Sum of electronic and zero-point Energies = -79.283497  
Sum of electronic and thermal Energies = -79.278527  
Sum of electronic and thermal Enthalpies = -79.277582  
Sum of electronic and thermal Free Energies = -79.309485

Cartesian coordinates

|   |           |           |           |
|---|-----------|-----------|-----------|
| B | 0.296011  | 0.796327  | 0.040367  |
| H | -0.629925 | 0.854152  | 0.825734  |
| H | 0.484260  | 1.805952  | -0.574055 |
| B | 1.272337  | -0.498073 | -0.056961 |
| H | 1.113929  | -1.480772 | 0.613387  |
| H | 2.264093  | -0.465605 | -0.737254 |
| H | 1.280732  | 0.561779  | 0.863415  |
| H | -2.080619 | -0.362519 | 0.938693  |
| B | -1.437828 | -0.297971 | -0.083942 |
| H | -1.180131 | -1.380580 | -0.535740 |
| H | -1.904942 | 0.466180  | -0.891499 |

Vibrational frequencies

|           |           |           |
|-----------|-----------|-----------|
| -579.1702 | 189.5467  | 341.1059  |
| 391.6743  | 454.2161  | 638.5973  |
| 816.2923  | 824.8347  | 882.0981  |
| 917.7821  | 945.9226  | 983.4509  |
| 1061.3714 | 1105.5053 | 1142.0123 |
| 1191.2502 | 1209.5231 | 1231.4671 |
| 1326.5134 | 1996.9454 | 2471.4640 |
| 2500.2929 | 2526.4755 | 2542.7422 |
| 2556.5310 | 2584.2448 | 2593.9773 |
